# Supplementary material for: Fisheries Sustainability Eroded by the Loss of Vulnerable Dominant Taxa and Insufficient Compensatory Production in a Coral Reef Seascape
Source: Preprints.org preprint supplement (doi:10.20944/preprints202410.2514.v1), 2024-10-31
Supplement: Supplementary file 1 [file supplementary]

Supplementary materials

Supplementary Table 1a – Description of the 7 fisheries reserves (permantly closed to fishing) in the southern Kenya, northern Tanzania leeward reef lagoon. Reserves arranged from oldest to newest and the size of the closure and sampling periods included. Fishing grounds from north to south and the area of the fishing grouds based on the community mapping project.

| Country | Reef name | Management | Year established | Size of closure/  fishing grounds(km2) | Sampling period |
| --- | --- | --- | --- | --- | --- |
| Kenya | Kisite | Reserves | 1978 | 34.2 | 1995 - 2023 |
| Tanzania | Chumbe | Reserves | 1994 | 0.63 | 1997 - 2022 |
| Tanzania | Misali | Reserves | 1998 | 22.8 | 2013 & 2018 |
| Kenya | Kibuyuni | Reserves | 2008 | 0.28 | 2010 - 2021 |
| Kenya | Wasini | Reserves | 2009 | 3.0 | 2019 - 2023 |
| Kenya | Mji wa kale | Reserves | 2014 | 0.03 | 2014 - 2023 |
| Kenya | Sii | Reserves | 2019 | 0.6 | 2012 & 2021 |
| Kenya | Nyuli ndogo | Fished reefs | NA | 0.39 | 2013 |
| Kenya | Sii | Fished reefs | NA | 10.3 | 2012 & 2021 |
| Kenya | Mwarembo | Fished reefs | NA | 0.75 | 2012 |
| Kenya | Mwipwa | Fished reefs | NA | 2.0 | 2013 |
| Kenya | Kichwa mtu | Fished reefs | NA | 0.34 | 2021 |
| Kenya | Mijira | Fished reefs | NA | 4.95 | 2013 & 2021 |

Supplementary Table 1b – Distances (km) between the fisheries reserves in the southern Kenya, northern Tanzania leeward reef lagoon. The mean distance is 80 ± 34 (± 95% CI).

| Sites | Sii | Mji wa kale | Kibuyuni | Wasini | Misali | Kisite |
| --- | --- | --- | --- | --- | --- | --- |
| Chumbe | 177.9 | 180.1 | 182.2 | 181.1 | 126.4 | 174.1 |
| Kisite | 11.9 | 6.9 | 9.1 | 7.5 | 64.3 |  |
| Misali | 72.2 | 68 | 72.3 | 70.2 |  |  |
| Kibuyuni | 8.1 | 5.6 |  |  |  |  |
| Mji wa kale | 13.1 |  |  |  |  |  |

Supplementary Table 2– List of Kenyan fish species derived from Fishbase and unpublished government (Kenya Marine and Fisheries Research Institute) and non-government (Wildlife Conservation Society) institutions. Species categorized as commercial or non-commercial based on observations at fish landing sites.

| Family | Species | Category |
| --- | --- | --- |
| Acanthuridae | Acanthurus auranticavus | Commercial |
| Acanthuridae | Acanthurus blochii | Commercial |
| Acanthuridae | Acanthurus dussumieri | Commercial |
| Acanthuridae | Acanthurus leucocheilus | Commercial |
| Acanthuridae | Acanthurus leucosternon | Commercial |
| Acanthuridae | Acanthurus lineatus | Commercial |
| Acanthuridae | Acanthurus mata | Commercial |
| Acanthuridae | Acanthurus nigricauda | Commercial |
| Acanthuridae | Acanthurus nigrofuscus | Commercial |
| Acanthuridae | Acanthurus tennenti | Commercial |
| Acanthuridae | Acanthurus tennentii | Commercial |
| Acanthuridae | Acanthurus thompsoni | Commercial |
| Acanthuridae | Acanthurus triostegus | Commercial |
| Acanthuridae | Acanthurus xanthopterus | Commercial |
| Acanthuridae | Ctenochaetus binotatus | Commercial |
| Acanthuridae | Ctenochaetus striatus | Commercial |
| Acanthuridae | Ctenochaetus strigosus | Commercial |
| Acanthuridae | Ctenochaetus truncatus | Commercial |
| Acanthuridae | Naso annulatus | Commercial |
| Acanthuridae | Naso brachycentron | Commercial |
| Acanthuridae | Naso brevirostris | Commercial |
| Acanthuridae | Naso elegans | Commercial |
| Acanthuridae | Naso fageni | Commercial |
| Acanthuridae | Naso hexacanthus | Commercial |
| Acanthuridae | Naso thynnoides | Commercial |
| Acanthuridae | Naso tonganus | Commercial |
| Acanthuridae | Naso tuberosus | Commercial |
| Acanthuridae | Naso unicornis | Commercial |
| Acanthuridae | Naso vlamingii | Commercial |
| Acanthuridae | Paracanthurus hepatus | Commercial |
| Acanthuridae | Zebrasoma desjardinii | Commercial |
| Acanthuridae | Zebrasoma scopas | Commercial |
| Acanthuridae | Zebrasoma veliferum | Commercial |
| Aetobatidae | Aetobatus narinari | Commercial |
| Albulidae | Albula vulpes | Commercial |
| Antennariidae | Antennarius coccineus | Non-commercial |
| Antennariidae | Antennarius dorehensis | Non-commercial |
| Antennariidae | Antennarius hispidus | Non-commercial |
| Antennariidae | Antennarius indicus | Non-commercial |
| Antennariidae | Antennarius nummifer | Non-commercial |
| Antennariidae | Antennarius pictus | Non-commercial |
| Antennariidae | Antennarius striatus | Non-commercial |
| Antennariidae | Histrio histrio | Non-commercial |
| Apistidae | Apistus carinatus | Non-commercial |
| Apogonidae | Apogon angustatus | Non-commercial |
| Apogonidae | Apogon apogonides | Non-commercial |
| Apogonidae | Apogon aureus | Non-commercial |
| Apogonidae | Apogon bryx | Non-commercial |
| Apogonidae | Apogon campbelli | Non-commercial |
| Apogonidae | Apogon cookii | Non-commercial |
| Apogonidae | Apogon cyanosoma | Non-commercial |
| Apogonidae | Apogon fleurieu | Non-commercial |
| Apogonidae | Apogon fraenatus | Non-commercial |
| Apogonidae | Apogon fuscus | Non-commercial |
| Apogonidae | Apogon gardineri | Non-commercial |
| Apogonidae | Apogon guamensis | Non-commercial |
| Apogonidae | Apogon hungi | Non-commercial |
| Apogonidae | Apogon kallopterus | Non-commercial |
| Apogonidae | Apogon lateralis | Non-commercial |
| Apogonidae | Apogon leptacanthus | Non-commercial |
| Apogonidae | Apogon natalensis | Non-commercial |
| Apogonidae | Apogon nigripes | Non-commercial |
| Apogonidae | Apogon nigrofasciatus | Non-commercial |
| Apogonidae | Apogon quadrifasciatus | Non-commercial |
| Apogonidae | Apogon queketti | Non-commercial |
| Apogonidae | Apogon rubellus | Non-commercial |
| Apogonidae | Apogon savayensis | Non-commercial |
| Apogonidae | Apogon semiornatus | Non-commercial |
| Apogonidae | Apogon taeniatus | Non-commercial |
| Apogonidae | Apogon taeniophorus | Non-commercial |
| Apogonidae | Apogon talboti | Non-commercial |
| Apogonidae | Apogon thermalis | Non-commercial |
| Apogonidae | Apogon timorensis | Non-commercial |
| Apogonidae | Apogonichthys ocellatus | Non-commercial |
| Apogonidae | Apogonichthys perdix | Non-commercial |
| Apogonidae | Archamia flavofasciata | Non-commercial |
| Apogonidae | Archamia fucata | Non-commercial |
| Apogonidae | Archamia mozambiquensis | Non-commercial |
| Apogonidae | Cheilodipterus arabicus | Non-commercial |
| Apogonidae | Cheilodipterus artus | Non-commercial |
| Apogonidae | Cheilodipterus macrodon | Non-commercial |
| Apogonidae | Cheilodipterus quinquelineatus | Non-commercial |
| Apogonidae | Foa fo | Non-commercial |
| Apogonidae | Fowleria aurita | Non-commercial |
| Apogonidae | Fowleria marmorata | Non-commercial |
| Apogonidae | Fowleria variegata | Non-commercial |
| Apogonidae | Gymnapogon africanus | Non-commercial |
| Apogonidae | Neamia octospina | Non-commercial |
| Apogonidae | Pseudamia gelatinosa | Non-commercial |
| Apogonidae | Pseudamiops pellucidus | Non-commercial |
| Apogonidae | Rhabdamia gracilis | Non-commercial |
| Apogonidae | Siphamia mossambica | Non-commercial |
| Apogonidae | Sphaeramia orbicularis | Non-commercial |
| Apogonidae | Taeniamia mozambiquensis | Non-commercial |
| Ariidae | Plicofollis polystaphylodon | Non-commercial |
| Atherinidae | Atherinomorus lacunosus | Non-commercial |
| Atherinidae | Hypoatherina temminckii | Non-commercial |
| Aulostomidae | Aulostomus chinensis | Non-commercial |
| Balistidae | Abalistes stellatus | Non-commercial |
| Balistidae | Balistapus undulatus | Non-commercial |
| Balistidae | Balistoides conspicillum | Non-commercial |
| Balistidae | Balistoides viridescens | Non-commercial |
| Balistidae | Canthidermis maculatus | Non-commercial |
| Balistidae | Melichthys indicus | Non-commercial |
| Balistidae | Melichthys niger | Non-commercial |
| Balistidae | Melichthys vidua | Non-commercial |
| Balistidae | Odonus niger | Non-commercial |
| Balistidae | Pseudobalistes flavimarginatus | Non-commercial |
| Balistidae | Pseudobalistes fuscus | Non-commercial |
| Balistidae | Rhinecanthus aculeatus | Non-commercial |
| Balistidae | Rhinecanthus rectangulus | Non-commercial |
| Balistidae | Sufflamen bursa | Non-commercial |
| Balistidae | Sufflamen chrysopterum | Non-commercial |
| Balistidae | Sufflamen chrysopterus | Non-commercial |
| Balistidae | Sufflamen fraenatum | Non-commercial |
| Balistidae | Sufflamen fraenatus | Non-commercial |
| Belonidae | Ablennes hians | Commercial |
| Belonidae | Platybelone argalus | Commercial |
| Belonidae | Strongylura leiura | Commercial |
| Belonidae | Tylosurus acus | Commercial |
| Belonidae | Tylosurus crocodilus | Commercial |
| Blenniidae | Alloblennius parvus | Non-commercial |
| Blenniidae | Alticus kirkii | Non-commercial |
| Blenniidae | Antennablennius australis | Non-commercial |
| Blenniidae | Antennablennius bifilum | Non-commercial |
| Blenniidae | Antennablennius variopunctatus | Non-commercial |
| Blenniidae | Antennablennius velifer | Non-commercial |
| Blenniidae | Aspidontus dussumieri | Non-commercial |
| Blenniidae | Aspidontus taeniatus | Non-commercial |
| Blenniidae | Atrosalarias fuscus | Non-commercial |
| Blenniidae | Blenniella chrysospilos | Non-commercial |
| Blenniidae | Blenniella cyanostigma | Non-commercial |
| Blenniidae | Blenniella gibbifrons | Non-commercial |
| Blenniidae | Blenniella periophthalmus | Non-commercial |
| Blenniidae | Cirripectes auritus | Non-commercial |
| Blenniidae | Cirripectes castaneus | Non-commercial |
| Blenniidae | Cirripectes filamentosus | Non-commercial |
| Blenniidae | Cirripectes gilberti | Non-commercial |
| Blenniidae | Cirripectes perustus | Non-commercial |
| Blenniidae | Cirripectes polyzona | Non-commercial |
| Blenniidae | Cirripectes quagga | Non-commercial |
| Blenniidae | Cirripectes stigmaticus | Non-commercial |
| Blenniidae | Ecsenius nalolo | Non-commercial |
| Blenniidae | Entomacrodus epalzeocheilus | Non-commercial |
| Blenniidae | Entomacrodus striatus | Non-commercial |
| Blenniidae | Entomacrodus vermiculatus | Non-commercial |
| Blenniidae | Exallias brevis | Non-commercial |
| Blenniidae | Glyptoparus delicatulus | Non-commercial |
| Blenniidae | Hirculops corniger | Non-commercial |
| Blenniidae | Istiblennius bellus | Non-commercial |
| Blenniidae | Istiblennius dussumieri | Non-commercial |
| Blenniidae | Istiblennius edentulus | Non-commercial |
| Blenniidae | Istiblennius spilotus | Non-commercial |
| Blenniidae | Istiblennius steindachneri | Non-commercial |
| Blenniidae | Laiphognathus multimaculatus | Non-commercial |
| Blenniidae | Meiacanthus mossambicus | Non-commercial |
| Blenniidae | Omobranchus elongatus | Non-commercial |
| Blenniidae | Omobranchus fasciolatus | Non-commercial |
| Blenniidae | Omobranchus punctatus | Non-commercial |
| Blenniidae | Pereulixia kosiensis | Non-commercial |
| Blenniidae | Petroscirtes breviceps | Non-commercial |
| Blenniidae | Petroscirtes mitratus | Non-commercial |
| Blenniidae | Petroscirtes xestus | Non-commercial |
| Blenniidae | Plagiotremus rhinorhynchus | Non-commercial |
| Blenniidae | Plagiotremus tapeinosoma | Non-commercial |
| Blenniidae | Salarias fasciatus | Non-commercial |
| Blenniidae | Xiphasia setifer | Non-commercial |
| Bothidae | Asterorhombus fijiensis | Non-commercial |
| Bothidae | Asterorhombus intermedius | Non-commercial |
| Bothidae | Bothus mancus | Non-commercial |
| Bothidae | Bothus pantherinus | Non-commercial |
| Caesionidae | Caesio caerulaurea | Commercial |
| Caesionidae | Caesio lunaris | Commercial |
| Caesionidae | Caesio sp. | Commercial |
| Caesionidae | Caesio teres | Commercial |
| Caesionidae | Caesio varilineata | Commercial |
| Caesionidae | Caesio xanthonota | Commercial |
| Caesionidae | Gymnocaesio gymnoptera | Commercial |
| Caesionidae | Pterocaesio atrysozona | Commercial |
| Caesionidae | Pterocaesio capricornis | Commercial |
| Caesionidae | Pterocaesio chrysozona | Commercial |
| Caesionidae | Pterocaesio marri | Commercial |
| Caesionidae | Pterocaesio pisang | Commercial |
| Caesionidae | Pterocaesio tile | Commercial |
| Callionymidae | Callionymus filamentosus | Non-commercial |
| Callionymidae | Callionymus persicus | Non-commercial |
| Callionymidae | Diplogrammus infulatus | Non-commercial |
| Callionymidae | Synchiropus marmoratus | Non-commercial |
| Callionymidae | Synchiropus stellatus | Non-commercial |
| Caracanthidae | Caracanthus madagascariensis | Non-commercial |
| Caracanthidae | Caracanthus unipinna | Non-commercial |
| Carangidae | Alectis ciliaris | Commercial |
| Carangidae | Alectis indica | Commercial |
| Carangidae | Alectis indicus | Commercial |
| Carangidae | Alepes djedaba | Commercial |
| Carangidae | Atule mate | Commercial |
| Carangidae | Carangoides armatus | Commercial |
| Carangidae | Carangoides chrysophrys | Commercial |
| Carangidae | Carangoides ciliarius | Commercial |
| Carangidae | Carangoides coeruleopinnatus | Commercial |
| Carangidae | Carangoides dinema | Commercial |
| Carangidae | Carangoides equula | Commercial |
| Carangidae | Carangoides ferdau | Commercial |
| Carangidae | Carangoides fulvoguttatus | Commercial |
| Carangidae | Carangoides gymnostethus | Commercial |
| Carangidae | Carangoides malabaricus | Commercial |
| Carangidae | Carangoides oblongus | Commercial |
| Carangidae | Carangoides orthogrammus | Commercial |
| Carangidae | Caranx heberi | Commercial |
| Carangidae | Caranx ignobilis | Commercial |
| Carangidae | Caranx melampygus | Commercial |
| Carangidae | Caranx papuensis | Commercial |
| Carangidae | Caranx sexfasciatus | Commercial |
| Carangidae | Caranx tille | Commercial |
| Carangidae | Decadterus carangidae | Commercial |
| Carangidae | Decapterus kurroides | Commercial |
| Carangidae | Decapterus macrosoma | Commercial |
| Carangidae | Decapterus russelli | Commercial |
| Carangidae | Elagatis bipinnulata | Commercial |
| Carangidae | Gnathanodon speciosus | Commercial |
| Carangidae | Megalaspis cordyla | Commercial |
| Carangidae | Parastromateus niger | Commercial |
| Carangidae | Scomberoides commersonnianus | Commercial |
| Carangidae | Scomberoides lysan | Commercial |
| Carangidae | Scomberoides tala | Commercial |
| Carangidae | Scomberoides tol | Commercial |
| Carangidae | Selar crumenophthalmus | Commercial |
| Carangidae | Seriola rivoliana | Commercial |
| Carangidae | Seriolina nigrofasciata | Commercial |
| Carangidae | Trachinotus baillonii | Commercial |
| Carangidae | Trachinotus blochii | Commercial |
| Carangidae | Trachurus indicus | Commercial |
| Carangidae | Ulua mentalis | Commercial |
| Carapidae | Onuxodon fowleri | Non-commercial |
| Carcharhinidae | Carcharhinus albimarginatus | Commercial |
| Carcharhinidae | Carcharhinus amblyrhynchos | Commercial |
| Carcharhinidae | Carcharhinus leucas | Commercial |
| Carcharhinidae | Carcharhinus limbatus | Commercial |
| Carcharhinidae | Carcharhinus macloti | Commercial |
| Carcharhinidae | Carcharhinus melanopterus | Commercial |
| Carcharhinidae | Carcharhinus sealei | Commercial |
| Carcharhinidae | Carcharhinus sorrah | Commercial |
| Carcharhinidae | Negaprion acutidens | Commercial |
| Carcharhinidae | Prionace glauca | Commercial |
| Carcharhinidae | Triaenodon obesus | Commercial |
| Centriscidae | Aeoliscus punctulata | Non-commercial |
| Chaetodontidae | Chaetodon auriga | Non-commercial |
| Chaetodontidae | Chaetodon bennetti | Non-commercial |
| Chaetodontidae | Chaetodon blackburni | Non-commercial |
| Chaetodontidae | Chaetodon citrinellus | Non-commercial |
| Chaetodontidae | Chaetodon dolosus | Non-commercial |
| Chaetodontidae | Chaetodon falcula | Non-commercial |
| Chaetodontidae | Chaetodon guttatissimus | Non-commercial |
| Chaetodontidae | Chaetodon interruptus | Non-commercial |
| Chaetodontidae | Chaetodon kleinii | Non-commercial |
| Chaetodontidae | Chaetodon leucopleura | Non-commercial |
| Chaetodontidae | Chaetodon lineolatus | Non-commercial |
| Chaetodontidae | Chaetodon lunula | Non-commercial |
| Chaetodontidae | Chaetodon madagaskariensis | Non-commercial |
| Chaetodontidae | Chaetodon melannotus | Non-commercial |
| Chaetodontidae | Chaetodon meyeri | Non-commercial |
| Chaetodontidae | Chaetodon somaliensis | Non-commercial |
| Chaetodontidae | Chaetodon triangulum | Non-commercial |
| Chaetodontidae | Chaetodon trifascialis | Non-commercial |
| Chaetodontidae | Chaetodon trifasciatus | Non-commercial |
| Chaetodontidae | Chaetodon unimaculatus | Non-commercial |
| Chaetodontidae | Chaetodon vagabundus | Non-commercial |
| Chaetodontidae | Chaetodon xanthocephalus | Non-commercial |
| Chaetodontidae | Chaetodon zanzibarensis | Non-commercial |
| Chaetodontidae | Chaetodon zanzibariensis | Non-commercial |
| Chaetodontidae | Forcipiger flavissimus | Non-commercial |
| Chaetodontidae | Forcipiger longirostris | Non-commercial |
| Chaetodontidae | Hemitaurichthys zoster | Non-commercial |
| Chaetodontidae | Heniochus acuminatus | Non-commercial |
| Chaetodontidae | Heniochus diphreutes | Non-commercial |
| Chaetodontidae | Heniochus moncerous | Non-commercial |
| Chaetodontidae | Heniochus monoceros | Non-commercial |
| Chanidae | Chanos chanos | Commercial |
| Chirocentridae | Chirocentrus dorab | Commercial |
| Cirrhitidae | Amblycirrhitus bimacula | Non-commercial |
| Cirrhitidae | Cirrhitichthys oxycephalus | Non-commercial |
| Cirrhitidae | Cirrhitus pinnulats | Non-commercial |
| Cirrhitidae | Cirrhitus pinnulatus | Non-commercial |
| Cirrhitidae | Cyprinocirrhite polyactis | Non-commercial |
| Cirrhitidae | Oxycirrhites typus | Non-commercial |
| Cirrhitidae | Paracirrhites arcatus | Non-commercial |
| Cirrhitidae | Paracirrhites forsteri | Non-commercial |
| Clupeidae | Herklotsichthys quadrimaculatus | Commercial |
| Clupeidae | Sardinella gibbosa | Commercial |
| Clupeidae | Spratelloides delicatulus | Commercial |
| Clupeidae | Spratelloides gracilis | Commercial |
| Congridae | Ariosoma scheelei | Non-commercial |
| Congridae | Conger cinereus | Non-commercial |
| Creediidae | Limnichthys nitidus | Non-commercial |
| Cynoglossidae | Cynoglossus lachneri | Non-commercial |
| Cynoglossidae | Cynoglossus lida | Non-commercial |
| Dactylopteridae | Dactyloptena orientalis | Non-commercial |
| Dasyatidae | Dasyatis kuhlii | Commercial |
| Dasyatidae | Himantura uarnak | Commercial |
| Dasyatidae | Maculabatis ambigua | Commercial |
| Dasyatidae | Maculabatis anak | Commercial |
| Dasyatidae | Pastinachus sephen | Commercial |
| Dasyatidae | Taeniura lymma | Commercial |
| Dasyatidae | Taeniura meyeni | Commercial |
| Dasyatidae | Taeniurops meyeni | Commercial |
| Dasyatidae | Urogymnus asperrimus | Commercial |
| Dinopercidae | Dinoperca petersi | Non-commercial |
| Diodontidae | Cyclichthys orbicularis | Non-commercial |
| Diodontidae | Diodon eydouxii | Non-commercial |
| Diodontidae | Diodon holacanthus | Non-commercial |
| Diodontidae | Diodon holocanthus | Non-commercial |
| Diodontidae | Diodon hystrix | Non-commercial |
| Diodontidae | Diodon liturosus | Non-commercial |
| Dorosomatidae | Sardinella albella | Commercial |
| Dorosomatidae | Sardinella longiceps | Commercial |
| Dorosomatidae | Sardinella neglecta | Commercial |
| Drepaneidae | Drepane longimana | Non-commercial |
| Echeneidae | Echeneis naucrates | Non-commercial |
| Eleotridae | Calumia godeffroyi | Non-commercial |
| Engraulidae | Encrasicholina heteroloba | Commercial |
| Ephippidae | Platax orbicularis | Non-commercial |
| Ephippidae | Platax teira | Non-commercial |
| Fistulariidae | Fistularia commersonii | Non-commercial |
| Fistulariidae | Fistularia petimba | Non-commercial |
| Gerreidae | Gerres argyreus | Commercial |
| Gerreidae | Gerres filamentosus | Commercial |
| Gerreidae | Gerres longirostris | Commercial |
| Gerreidae | Gerres oblongus | Commercial |
| Gerreidae | Gerres oyena | Commercial |
| Ginglymostomatidae | Nebrius ferrugineum | Commercial |
| Ginglymostomatidae | Pseudoginglymos brevicaudatum | Commercial |
| Gobiesocidae | Lepadichthys coccinotaenia | Non-commercial |
| Gobiidae | Amblyeleotris delicatulus | Non-commercial |
| Gobiidae | Amblyeleotris diagonalis | Non-commercial |
| Gobiidae | Amblyeleotris fasciata | Non-commercial |
| Gobiidae | Amblyeleotris periophthalma | Non-commercial |
| Gobiidae | Amblyeleotris steinitzi | Non-commercial |
| Gobiidae | Amblygobius albimaculatus | Non-commercial |
| Gobiidae | Amblygobius sewardii | Non-commercial |
| Gobiidae | Amblygobius sphynx | Non-commercial |
| Gobiidae | Amblygobius tekomaji | Non-commercial |
| Gobiidae | Asterropteryx semipunctata | Non-commercial |
| Gobiidae | Austrolethops wardi | Non-commercial |
| Gobiidae | Barbuligobius boehlkei | Non-commercial |
| Gobiidae | Bathygobius coalitus | Non-commercial |
| Gobiidae | Bathygobius cocosensis | Non-commercial |
| Gobiidae | Bathygobius cotticeps | Non-commercial |
| Gobiidae | Bathygobius cyclopterus | Non-commercial |
| Gobiidae | Bathygobius fuscus | Non-commercial |
| Gobiidae | Bryaninops ridens | Non-commercial |
| Gobiidae | Callogobius bifasciatus | Non-commercial |
| Gobiidae | Callogobius flavobrunneus | Non-commercial |
| Gobiidae | Callogobius maculipinnis | Non-commercial |
| Gobiidae | Callogobius plumatus | Non-commercial |
| Gobiidae | Callogobius sclateri | Non-commercial |
| Gobiidae | Cryptocentrus cryptocentrus | Non-commercial |
| Gobiidae | Cryptocentrus fasciatus | Non-commercial |
| Gobiidae | Cryptocentrus lutheri | Non-commercial |
| Gobiidae | Cryptocentrus malindiensis | Non-commercial |
| Gobiidae | Cryptocentrus strigilliceps | Non-commercial |
| Gobiidae | Ctenogobiops maculosus | Non-commercial |
| Gobiidae | Eviota albolineata | Non-commercial |
| Gobiidae | Eviota distigma | Non-commercial |
| Gobiidae | Eviota prasinus | Non-commercial |
| Gobiidae | Eviota sebreei | Non-commercial |
| Gobiidae | Favonigobius reichei | Non-commercial |
| Gobiidae | Fusigobius duospilus | Non-commercial |
| Gobiidae | Fusigobius inframaculatus | Non-commercial |
| Gobiidae | Fusigobius neophytus | Non-commercial |
| Gobiidae | Gladiogobius species | Non-commercial |
| Gobiidae | Gnatholepis anjerensis | Non-commercial |
| Gobiidae | Gnatholepis cauerensis | Non-commercial |
| Gobiidae | Gobiodon citrinus | Non-commercial |
| Gobiidae | Gobiodon rivulatus | Non-commercial |
| Gobiidae | Hetereleotris caminata | Non-commercial |
| Gobiidae | Hetereleotris kenyae | Non-commercial |
| Gobiidae | Hetereleotris vulgaris | Non-commercial |
| Gobiidae | Hetereleotris zanzibarensis | Non-commercial |
| Gobiidae | Istigobius decoratus | Non-commercial |
| Gobiidae | Istigobius ornatus | Non-commercial |
| Gobiidae | Istigobius spence | Non-commercial |
| Gobiidae | Koumansetta hectori | Non-commercial |
| Gobiidae | Mahidolia mystacinus | Non-commercial |
| Gobiidae | Oplopomops atherinoides | Non-commercial |
| Gobiidae | Oplopomus oplopomus | Non-commercial |
| Gobiidae | Opua atherinoides | Non-commercial |
| Gobiidae | Paragobiodon echinocephalus | Non-commercial |
| Gobiidae | Paragobiodon lacunicola | Non-commercial |
| Gobiidae | Paragobiodon modestus | Non-commercial |
| Gobiidae | Pleruosicya annandalei | Non-commercial |
| Gobiidae | Pleruosicya boldinghi | Non-commercial |
| Gobiidae | Pleruosicya mossambica | Non-commercial |
| Gobiidae | Pleruosicya muscarum | Non-commercial |
| Gobiidae | Priolepis anthioides | Non-commercial |
| Gobiidae | Priolepis cinctus | Non-commercial |
| Gobiidae | Priolepis inhaca | Non-commercial |
| Gobiidae | Trimma sheppardi | Non-commercial |
| Gobiidae | Trimma volcana | Non-commercial |
| Gobiidae | Valenciennea helsdingenii | Non-commercial |
| Gobiidae | Valenciennea puellaris | Non-commercial |
| Gobiidae | Valenciennea sexguttata | Non-commercial |
| Gobiidae | Valenciennea strigata | Non-commercial |
| Gobiidae | Valenciennea wardii | Non-commercial |
| Gobiidae | Vanderhorstia delagoae | Non-commercial |
| Gobiidae | Vanderhorstia ornatissima | Non-commercial |
| Gobiidae | Yongeichthys nebulosus | Non-commercial |
| Haemulidae | Diagramma pictum | Commercial |
| Haemulidae | Plectorhinchus albovittatus | Commercial |
| Haemulidae | Plectorhinchus centurio | Commercial |
| Haemulidae | Plectorhinchus chaetodontoides | Commercial |
| Haemulidae | Plectorhinchus chubbi | Commercial |
| Haemulidae | Plectorhinchus flavomaculatus | Commercial |
| Haemulidae | Plectorhinchus gaterinus | Commercial |
| Haemulidae | Plectorhinchus gibbosus | Commercial |
| Haemulidae | Plectorhinchus lessonii | Commercial |
| Haemulidae | Plectorhinchus obscurus | Commercial |
| Haemulidae | Plectorhinchus paulayi | Commercial |
| Haemulidae | Plectorhinchus plagiodesmus | Commercial |
| Haemulidae | Plectorhinchus playfairi | Commercial |
| Haemulidae | Plectorhinchus schotaf | Commercial |
| Haemulidae | Plectorhinchus sordidus | Commercial |
| Haemulidae | Plectorhinchus vittatus | Commercial |
| Haemulidae | Plectorhincus obscurus | Commercial |
| Haemulidae | Pomadasys argenteus | Commercial |
| Haemulidae | Pomadasys olivaceus | Commercial |
| Hemiramphidae | Hemiramphus far | Commercial |
| Hemiramphidae | Hemiramphus marginatus | Commercial |
| Hemiramphidae | Hyporhamphus affinis | Commercial |
| Hemiramphidae | Hyporhamphus dussumieri | Commercial |
| Hemiramphidae | Zenarchopterus dispar | Commercial |
| Hemiramphidae | Zenarchopterus gilli | Commercial |
| Holocentridae | Myripristis adusta | Non-commercial |
| Holocentridae | Myripristis argenteus | Non-commercial |
| Holocentridae | Myripristis berndti | Non-commercial |
| Holocentridae | Myripristis hexagona | Non-commercial |
| Holocentridae | Myripristis kuntee | Non-commercial |
| Holocentridae | Myripristis murdjan | Non-commercial |
| Holocentridae | Myripristis pralinia | Non-commercial |
| Holocentridae | Myripristis seychellensis | Non-commercial |
| Holocentridae | Myripristis violacea | Non-commercial |
| Holocentridae | Neoniphon opercularis | Non-commercial |
| Holocentridae | Neoniphon sammara | Non-commercial |
| Holocentridae | Plectrypops lima | Non-commercial |
| Holocentridae | Sargocentron caudimaculatum | Non-commercial |
| Holocentridae | Sargocentron diadema | Non-commercial |
| Holocentridae | Sargocentron ittodai | Non-commercial |
| Holocentridae | Sargocentron macrosquamis | Non-commercial |
| Holocentridae | Sargocentron praslin | Non-commercial |
| Holocentridae | Sargocentron punctatissimum | Non-commercial |
| Holocentridae | Sargocentron rubrum | Non-commercial |
| Holocentridae | Sargocentron spiniferum | Non-commercial |
| Holocentridae | Sargocentron tiereoides | Non-commercial |
| Holocentridae | Sargocentron violaceum | Non-commercial |
| Kuhliidae | Kuhlia mugil | Commercial |
| Kyphosidae | Kyphosus cinerascens | Commercial |
| Kyphosidae | Kyphosus vaigensis | Commercial |
| Kyphosidae | Kyphosus vaigiensis | Commercial |
| Labridae | Anampses caeruleopunctatus | Commercial |
| Labridae | Anampses lineatus | Commercial |
| Labridae | Anampses meleagrides | Commercial |
| Labridae | Anampses twistii | Commercial |
| Labridae | Bodianus anthioides | Non-commercial |
| Labridae | Bodianus axillaris | Non-commercial |
| Labridae | Bodianus bilunulatus | Commercial |
| Labridae | Bodianus diana | Non-commercial |
| Labridae | Bodianus leucostictus | Commercial |
| Labridae | Bodianus macrognathos | Commercial |
| Labridae | Bodianus trilineatus | Commercial |
| Labridae | Cheilinus chlorourus | Commercial |
| Labridae | Cheilinus fasciatus | Commercial |
| Labridae | Cheilinus mentalis | Commercial |
| Labridae | Cheilinus oxycephalus | Commercial |
| Labridae | Cheilinus trilobatus | Commercial |
| Labridae | Cheilinus undulatus | Commercial |
| Labridae | Cheilio inermis | Commercial |
| Labridae | Choerodon gymnogenys | Commercial |
| Labridae | Choerodon robustus | Commercial |
| Labridae | Cirrhilabrus exquisitus | Non-commercial |
| Labridae | Coris aygula | Commercial |
| Labridae | Coris caudimacula | Non-commercial |
| Labridae | Coris cuvieri | Commercial |
| Labridae | Coris formosa | Commercial |
| Labridae | Cymolutes praetextatus | Non-commercial |
| Labridae | Cymolutes torquatus | Non-commercial |
| Labridae | Epibulus insidiator | Non-commercial |
| Labridae | Gomphosus caeruleus | Commercial |
| Labridae | Halichoeres cosmetus | Non-commercial |
| Labridae | Halichoeres dussumieri | Non-commercial |
| Labridae | Halichoeres hortulanus | Commercial |
| Labridae | Halichoeres iridis | Non-commercial |
| Labridae | Halichoeres lapillus | Non-commercial |
| Labridae | Halichoeres marginatus | Commercial |
| Labridae | Halichoeres nebulosus | Non-commercial |
| Labridae | Halichoeres nigrescens | Non-commercial |
| Labridae | Halichoeres scapularis | Commercial |
| Labridae | Halichoeres trispilus | Non-commercial |
| Labridae | Halichoeres zeylonicus | Non-commercial |
| Labridae | Hemigymnus fasciatus | Commercial |
| Labridae | Hemigymnus melapterus | Commercial |
| Labridae | Hologymnosus annulatus | Non-commercial |
| Labridae | Hologymnosus doliatus | Non-commercial |
| Labridae | Iniistius aneitensis | Non-commercial |
| Labridae | Iniistius celebicus | Non-commercial |
| Labridae | Iniistius pavo | Non-commercial |
| Labridae | Iniistius pentadactylus | Non-commercial |
| Labridae | Labrichthys unilineatus | Non-commercial |
| Labridae | Labroides bicolor | Non-commercial |
| Labridae | Labroides dimidatus | Non-commercial |
| Labridae | Labroides dimidiatus | Non-commercial |
| Labridae | Labropsis xanthonota | Non-commercial |
| Labridae | Macropharyngodo bipartitus | Commercial |
| Labridae | Macropharyngodo lapillus | Commercial |
| Labridae | Macropharyngodon bipartitus | Commercial |
| Labridae | Macropharyngodon cyanoguttatus | Commercial |
| Labridae | Novaculichthys macrolepidotus | Commercial |
| Labridae | Novaculichthys taeniourus | Commercial |
| Labridae | Oxycheilinus bimaculatus | Non-commercial |
| Labridae | Oxycheilinus digramma | Non-commercial |
| Labridae | Oxycheilinus orientalis | Non-commercial |
| Labridae | Oxycheilnus bimaculatus | Non-commercial |
| Labridae | Paracheilinus attenuatus | Non-commercial |
| Labridae | Paracheilinus mccoskeri | Non-commercial |
| Labridae | Pseudocheilinus evanidus | Non-commercial |
| Labridae | Pseudocheilinus evinidus | Non-commercial |
| Labridae | Pseudocheilinus hexataenia | Non-commercial |
| Labridae | Pseudodax moluccanus | Commercial |
| Labridae | Pseudojuloides argyreogaster | Non-commercial |
| Labridae | Pteragogus flagellifer | Commercial |
| Labridae | Pteragogus pelycus | Non-commercial |
| Labridae | Pteragogus taeniops | Non-commercial |
| Labridae | Stethojulis albovittata | Non-commercial |
| Labridae | Stethojulis interrupta | Non-commercial |
| Labridae | Stethojulis strigiventer | Non-commercial |
| Labridae | Suezichthys russelli | Commercial |
| Labridae | Thalassoma amblycephalum | Commercial |
| Labridae | Thalassoma hardwicke | Commercial |
| Labridae | Thalassoma hebraicum | Commercial |
| Labridae | Thalassoma lunare | Commercial |
| Labridae | Thalassoma purpureum | Commercial |
| Labridae | Thalassoma quinquevittatum | Commercial |
| Labridae | Thalassoma trilobatum | Commercial |
| Labridae | Wetmorella albofasciata | Non-commercial |
| Labridae | Wetmorella nigropinnata | Non-commercial |
| Leiognathidae | Aurigequula fasciata | Non-commercial |
| Leiognathidae | Gazza minuta | Non-commercial |
| Leiognathidae | Leiognathus berbis | Commercial |
| Leiognathidae | Leiognathus equula | Non-commercial |
| Leiognathidae | Leiognathus equulus | Non-commercial |
| Lethrinidae | Gnathodentex aureolineatus | Commercial |
| Lethrinidae | Gnathodentex aurolineatus | Commercial |
| Lethrinidae | Gymnocranius elongatus | Commercial |
| Lethrinidae | Gymnocranius grandoculis | Commercial |
| Lethrinidae | Lethrinus borbonicus | Commercial |
| Lethrinidae | Lethrinus conchyliatus | Commercial |
| Lethrinidae | Lethrinus crocineus | Commercial |
| Lethrinidae | Lethrinus erythracanthus | Commercial |
| Lethrinidae | Lethrinus erythropterus | Commercial |
| Lethrinidae | Lethrinus harak | Commercial |
| Lethrinidae | Lethrinus lentjan | Commercial |
| Lethrinidae | Lethrinus mahsena | Commercial |
| Lethrinidae | Lethrinus microdon | Commercial |
| Lethrinidae | Lethrinus miniatus | Commercial |
| Lethrinidae | Lethrinus nebulosus | Commercial |
| Lethrinidae | Lethrinus obsoletus | Commercial |
| Lethrinidae | Lethrinus olivaceus | Commercial |
| Lethrinidae | Lethrinus rubrioperculatus | Commercial |
| Lethrinidae | Lethrinus variegatus | Commercial |
| Lethrinidae | Lethrinus xanthochilus | Commercial |
| Lethrinidae | Monotaxis grandoculis | Commercial |
| Lobotidae | Lobotes surinamensis | Commercial |
| Lutjanidae | Aphareus furca | Commercial |
| Lutjanidae | Aphareus rutilans | Commercial |
| Lutjanidae | Aprion virescens | Commercial |
| Lutjanidae | Etelis coruscans | Commercial |
| Lutjanidae | Lutjanus argentimaculatus | Commercial |
| Lutjanidae | Lutjanus bengalensis | Commercial |
| Lutjanidae | Lutjanus bohar | Commercial |
| Lutjanidae | Lutjanus ehrenbergii | Commercial |
| Lutjanidae | Lutjanus erythropterus | Commercial |
| Lutjanidae | Lutjanus fulviflamma | Commercial |
| Lutjanidae | Lutjanus fulvus | Commercial |
| Lutjanidae | Lutjanus gibbus | Commercial |
| Lutjanidae | Lutjanus johnii | Commercial |
| Lutjanidae | Lutjanus kasmira | Commercial |
| Lutjanidae | Lutjanus lutjanus | Commercial |
| Lutjanidae | Lutjanus monostigma | Commercial |
| Lutjanidae | Lutjanus rivulatus | Commercial |
| Lutjanidae | Lutjanus russelli | Commercial |
| Lutjanidae | Lutjanus sanguineus | Commercial |
| Lutjanidae | Lutjanus sebae | Commercial |
| Lutjanidae | Macolor niger | Commercial |
| Lutjanidae | Paracaesio xanthura | Commercial |
| Lutjanidae | Pristipomoides filamentosus | Commercial |
| Lutjanidae | Pristipomoides sieboldii | Commercial |
| Lutjanidae | Pristipomoides zonatus | Commercial |
| Malacanthidae | Malacanthus brevirostris | Non-commercial |
| Malacanthidae | Malacanthus latovittatus | Non-commercial |
| Microdesmidae | Gunnellichthys copleyi | Non-commercial |
| Microdesmidae | Gunnellichthys monostigma | Non-commercial |
| Mobulidae | Manta birostris | Commercial |
| Mobulidae | Mobula eregoodootenkee | Commercial |
| Monacanthidae | Aluterus monoceros | Non-commercial |
| Monacanthidae | Aluterus scriptus | Non-commercial |
| Monacanthidae | Amanses scopas | Non-commercial |
| Monacanthidae | Cantherhines dumerilii | Non-commercial |
| Monacanthidae | Cantherhines fronticinctus | Non-commercial |
| Monacanthidae | Cantherhines pardalis | Non-commercial |
| Monacanthidae | Cantherhinus pardalis | Non-commercial |
| Monacanthidae | Oxymonacanthus longirostris | Non-commercial |
| Monacanthidae | Paraluteres prionurus | Non-commercial |
| Monacanthidae | Paramonacanthus frenatus | Non-commercial |
| Monacanthidae | Paramonacanthus nematophorus | Non-commercial |
| Monacanthidae | Pervagor janthinosoma | Non-commercial |
| Monacanthidae | Pseudalutarius nasicornis | Non-commercial |
| Monacanthidae | Stephanolepis auratus | Non-commercial |
| Monocentridae | Monocentris japonicus | Non-commercial |
| Monodactylidae | Monodactylus argenteus | Non-commercial |
| Monodactylidae | Monodactylus argtenteus | Non-commercial |
| Mugilidae | Crenimugil crenilabis | Commercial |
| Mugilidae | Ellochelon vaigiensis | Commercial |
| Mugilidae | Liza vaigiensis | Commercial |
| Mugilidae | Osteomugil engeli | Commercial |
| Mugilidae | Valamugil seheli | Commercial |
| Mullidae | Mulloidichthys flavolineatus | Commercial |
| Mullidae | Mulloidichthys vanicolensis | Commercial |
| Mullidae | Parupeneus barberinus | Commercial |
| Mullidae | Parupeneus ciliatus | Commercial |
| Mullidae | Parupeneus cyclostomus | Commercial |
| Mullidae | Parupeneus heptacanthus | Commercial |
| Mullidae | Parupeneus indicus | Commercial |
| Mullidae | Parupeneus macronemus | Commercial |
| Mullidae | Parupeneus pleurostigma | Commercial |
| Mullidae | Parupeneus rubescens | Commercial |
| Mullidae | Parupeneus seychellensis | Commercial |
| Mullidae | Parupeneus trifasciatus | Commercial |
| Mullidae | Upeneus margarethae | Commercial |
| Mullidae | Upeneus moluccensis | Commercial |
| Mullidae | Upeneus saiab | Commercial |
| Mullidae | Upeneus sulphureus | Commercial |
| Mullidae | Upeneus tragula | Commercial |
| Mullidae | Upeneus vittatus | Commercial |
| Muraenidae | Anarchias seychellensis | Commercial |
| Muraenidae | Echidna nebulosa | Commercial |
| Muraenidae | Echidna polyzona | Commercial |
| Muraenidae | Echidna unicolor | Commercial |
| Muraenidae | Gymnomuraena zebra | Commercial |
| Muraenidae | Gymnothorax buroensis | Commercial |
| Muraenidae | Gymnothorax chilospilus | Commercial |
| Muraenidae | Gymnothorax enigmaticus | Commercial |
| Muraenidae | Gymnothorax favagineus | Commercial |
| Muraenidae | Gymnothorax flavimarginatus | Commercial |
| Muraenidae | Gymnothorax griseus | Commercial |
| Muraenidae | Gymnothorax hepaticus | Commercial |
| Muraenidae | Gymnothorax javanicus | Commercial |
| Muraenidae | Gymnothorax johnsoni | Commercial |
| Muraenidae | Gymnothorax melatremus | Commercial |
| Muraenidae | Gymnothorax meleagris | Commercial |
| Muraenidae | Gymnothorax monochrous | Commercial |
| Muraenidae | Gymnothorax nudivomer | Commercial |
| Muraenidae | Gymnothorax pictus | Commercial |
| Muraenidae | Gymnothorax pindae | Commercial |
| Muraenidae | Gymnothorax richardsonii | Commercial |
| Muraenidae | Gymnothorax rueppelii | Commercial |
| Muraenidae | Gymnothorax undulatus | Commercial |
| Muraenidae | Scuticaria tigrina | Commercial |
| Muraenidae | Strophidon sathete | Commercial |
| Muraenidae | Uropterygius concolor | Commercial |
| Muraenidae | Uropterygius marmoratus | Commercial |
| Muraenidae | Uropterygius micropterus | Commercial |
| Myliobatidae | Aetobatus ocellatus | Commercial |
| Nemipteridae | Nemipterus bipunctatus | Commercial |
| Nemipteridae | Nemipterus randalli | Commercial |
| Nemipteridae | Scolopsis bimaculata | Commercial |
| Nemipteridae | Scolopsis bimaculatus | Commercial |
| Nemipteridae | Scolopsis frenatus | Commercial |
| Nemipteridae | Scolopsis ghanam | Commercial |
| Nemipteridae | Scolopsis torquata | Commercial |
| Ophichthidae | Callechelys bitaeniatus | Non-commercial |
| Ophichthidae | Callechelys marmorata | Non-commercial |
| Ophichthidae | Cirrhimuraena playfairii | Non-commercial |
| Ophichthidae | Ichthyapus vulturus | Non-commercial |
| Ophichthidae | Leiuranus semicinctus | Non-commercial |
| Ophichthidae | Muraenichthys laticaudatus | Non-commercial |
| Ophichthidae | Myrichthys colubrinus | Non-commercial |
| Ophichthidae | Myrichthys maculosus | Non-commercial |
| Ophichthidae | Myrophis microchir | Non-commercial |
| Ophichthidae | Phyllophichthus xenodontus | Non-commercial |
| Ophichthidae | Pisodonophis cancrivorus | Non-commercial |
| Ophidiidae | Brotula multibarbata | Non-commercial |
| Opistognathidae | Opistognathus afer | Non-commercial |
| Opistognathidae | Opistognathus margaretae | Non-commercial |
| Opistognathidae | Opistognathus muscatensis | Non-commercial |
| Opistognathidae | Opistognathus nigromarginatus | Non-commercial |
| Ostraciidae | Lactoria cornuta | Non-commercial |
| Ostraciidae | Lactoria fornasini | Non-commercial |
| Ostraciidae | Ostracion cubicum | Non-commercial |
| Ostraciidae | Ostracion cubicus | Non-commercial |
| Ostraciidae | Ostracion meleagris | Non-commercial |
| Ostraciidae | Tetrosomus gibbosus | Non-commercial |
| Ostraciidae | Tetrosomus republicae | Non-commercial |
| Pegasidae | Pegasus volitans | Non-commercial |
| Pempheridae | Parapriacanthus ransonneti | Non-commercial |
| Pempheridae | Pempheris adusta | Non-commercial |
| Pempheridae | Pempheris schwenkii | Non-commercial |
| Pempheridae | Pempheris vanicolensis | Non-commercial |
| Pinguipedidae | Parapercis hexophtalma | Non-commercial |
| Pinguipedidae | Parapercis maculata | Non-commercial |
| Pinguipedidae | Parapercis punctulata | Non-commercial |
| Pinguipedidae | Parapercis robinsoni | Non-commercial |
| Platycephalidae | Cociella crocodila | Non-commercial |
| Platycephalidae | Cociella punctulata | Non-commercial |
| Platycephalidae | Papilloculiceps longiceps | Non-commercial |
| Platycephalidae | Platycephalus indicus | Non-commercial |
| Platycephalidae | Rogadius pristiger | Non-commercial |
| Platycephalidae | Sunagocia arenicola | Non-commercial |
| Platycephalidae | Thysanophrys chiltonae | Non-commercial |
| Plesiopidae | Acanthoplesiops indicus | Non-commercial |
| Plesiopidae | Calloplesiops altivelis | Non-commercial |
| Plesiopidae | Plesiops coeruleolineatus | Non-commercial |
| Plesiopidae | Plesiops mystaxus | Non-commercial |
| Plotosidae | Plotosus limbatus | Non-commercial |
| Plotosidae | Plotosus lineatus | Non-commercial |
| Plotosidae | Plotosus nkunga | Non-commercial |
| Pomacanthidae | Apolemichthys trimaculatus | Non-commercial |
| Pomacanthidae | Centropyge acanthops | Non-commercial |
| Pomacanthidae | Centropyge bispinosa | Non-commercial |
| Pomacanthidae | Centropyge bispinosus | Non-commercial |
| Pomacanthidae | Centropyge flavicauda | Non-commercial |
| Pomacanthidae | Centropyge multispinis | Non-commercial |
| Pomacanthidae | Genicanthus caudovittatus | Non-commercial |
| Pomacanthidae | Pomacanthus annularis | Non-commercial |
| Pomacanthidae | Pomacanthus chrysurus | Non-commercial |
| Pomacanthidae | Pomacanthus imperator | Non-commercial |
| Pomacanthidae | Pomacanthus maculosus | Non-commercial |
| Pomacanthidae | Pomacanthus semicirculatus | Non-commercial |
| Pomacanthidae | Pygoplites diacanthus | Non-commercial |
| Pomacentridae | Abudefduf notatus | Non-commercial |
| Pomacentridae | Abudefduf septemfasciatus | Non-commercial |
| Pomacentridae | Abudefduf sexfasciatus | Non-commercial |
| Pomacentridae | Abudefduf sordidus | Non-commercial |
| Pomacentridae | Abudefduf sparoides | Non-commercial |
| Pomacentridae | Abudefduf vaigiensis | Non-commercial |
| Pomacentridae | Amblyglyphidodo indicus | Non-commercial |
| Pomacentridae | Amblyglyphidodon leucogaster | Non-commercial |
| Pomacentridae | Amphiprion akallopisos | Non-commercial |
| Pomacentridae | Amphiprion allardi | Non-commercial |
| Pomacentridae | Chromis agilis | Non-commercial |
| Pomacentridae | Chromis dasygenys | Non-commercial |
| Pomacentridae | Chromis dimidiata | Non-commercial |
| Pomacentridae | Chromis lepidolepis | Non-commercial |
| Pomacentridae | Chromis nigroanalis | Non-commercial |
| Pomacentridae | Chromis nigrura | Non-commercial |
| Pomacentridae | Chromis opercularis | Non-commercial |
| Pomacentridae | Chromis pembae | Non-commercial |
| Pomacentridae | Chromis ternatensis | Non-commercial |
| Pomacentridae | Chromis vanderbilti | Non-commercial |
| Pomacentridae | Chromis viridis | Non-commercial |
| Pomacentridae | Chromis weberi | Non-commercial |
| Pomacentridae | Chromis woodsi | Non-commercial |
| Pomacentridae | Chromis xutha | Non-commercial |
| Pomacentridae | Chrysiptera annulata | Non-commercial |
| Pomacentridae | Chrysiptera biocellata | Non-commercial |
| Pomacentridae | Chrysiptera brownriggii | Non-commercial |
| Pomacentridae | Chrysiptera glauca | Non-commercial |
| Pomacentridae | Chrysiptera leucopoma | Non-commercial |
| Pomacentridae | Chrysiptera unimaculata | Non-commercial |
| Pomacentridae | Dascyllus aruanus | Non-commercial |
| Pomacentridae | Dascyllus carneus | Non-commercial |
| Pomacentridae | Dascyllus trimaculatus | Non-commercial |
| Pomacentridae | Lepidozygus tapeinosoma | Non-commercial |
| Pomacentridae | Neoglyphidodon melas | Non-commercial |
| Pomacentridae | Neopomacentrus azysron | Non-commercial |
| Pomacentridae | Neopomacentrus cyanomos | Non-commercial |
| Pomacentridae | Neopomacentrus fuliginosus | Non-commercial |
| Pomacentridae | Neopomacentrus taeniurus | Non-commercial |
| Pomacentridae | Plectroglyphido dickii | Non-commercial |
| Pomacentridae | Plectroglyphido imparipennis | Non-commercial |
| Pomacentridae | Plectroglyphido johnstonianus | Non-commercial |
| Pomacentridae | Plectroglyphido lacrymatus | Non-commercial |
| Pomacentridae | Plectroglyphido leucozona | Non-commercial |
| Pomacentridae | Plectroglyphido phoenixensis | Non-commercial |
| Pomacentridae | Plectroglyphidodon dickii | Non-commercial |
| Pomacentridae | Plectroglyphidodon johnstonianus | Non-commercial |
| Pomacentridae | Plectroglyphidodon lacrymatus | Non-commercial |
| Pomacentridae | Pomacentrus aquilus | Non-commercial |
| Pomacentridae | Pomacentrus baenschi | Non-commercial |
| Pomacentridae | Pomacentrus caeruleus | Non-commercial |
| Pomacentridae | Pomacentrus fasciolatus | Non-commercial |
| Pomacentridae | Pomacentrus pavo | Non-commercial |
| Pomacentridae | Pomacentrus pulcherrimus | Non-commercial |
| Pomacentridae | Pomacentrus sulfureus | Non-commercial |
| Pomacentridae | Pomacentrus trichourus | Non-commercial |
| Pomacentridae | Pomacentrus trichrourus | Non-commercial |
| Pomacentridae | Pomacentrus trilineatus | Non-commercial |
| Pomacentridae | Stegastes albifasciatus | Non-commercial |
| Pomacentridae | Stegastes fasciolatus | Non-commercial |
| Pomacentridae | Stegastes lividus | Non-commercial |
| Pomacentridae | Stegastes nigricans | Non-commercial |
| Pomacentridae | Teixeirichhthys jordani | Non-commercial |
| Pomatomidae | Pomatomus saltatrix | Commercial |
| Priacanthidae | Heteropriacanth cruentatus | Commercial |
| Priacanthidae | Priacanthus hamrur | Commercial |
| Priacanthidae | Priacanthus heptacanthus | Commercial |
| Psettodidae | Psettodes erumei | Non-commercial |
| Pseudochromidae | Anisochromis kenyae | Non-commercial |
| Pseudochromidae | Chlidichthys bibulus | Non-commercial |
| Pseudochromidae | Chlidichthys johnvoelckeri | Non-commercial |
| Pseudochromidae | Chlidichthys pembae | Non-commercial |
| Pseudochromidae | Halidesmus polytretus | Non-commercial |
| Pseudochromidae | Halimuraena hexagonata | Non-commercial |
| Pseudochromidae | Haliophis guttatus | Non-commercial |
| Pseudochromidae | Pseudochromis dutoiti | Non-commercial |
| Pseudochromidae | Pseudochromis kristinae | Non-commercial |
| Pseudochromidae | Pseudochromis leucorhynchus | Non-commercial |
| Pseudochromidae | Pseudochromis melas | Non-commercial |
| Pseudochromidae | Pseudochromis tauberae | Non-commercial |
| Ptereleotridae | Nemateleotris magnifica | Non-commercial |
| Ptereleotridae | Ptereleotris evides | Non-commercial |
| Ptereleotridae | Ptereleotris microlepis | Non-commercial |
| Rhincodontidae | Rhincodon typus | Non-commercial |
| Rhinidae | Rhina ancylostomus | Commercial |
| Rhinobatidae | Rhina ancylostoma | Commercial |
| Rhinobatidae | Rhinobatos holcorhynchus | Commercial |
| Rhinobatidae | Rhynchobatus djiddensis | Commercial |
| Samaridae | Samariscus triocellatus | Non-commercial |
| Scaridae | Bolbometopon muricatum | Commercial |
| Scaridae | Calotomus carolinus | Commercial |
| Scaridae | Calotomus spinidens | Commercial |
| Scaridae | Calotomus viridescens | Commercial |
| Scaridae | Cetoscarus bicolor | Commercial |
| Scaridae | Cetoscarus ocellatus | Commercial |
| Scaridae | Chlorurus atrilunula | Commercial |
| Scaridae | Chlorurus cyanescens | Commercial |
| Scaridae | Chlorurus enneacanthus | Commercial |
| Scaridae | Chlorurus gibbus | Commercial |
| Scaridae | Chlorurus sordidus | Commercial |
| Scaridae | Chlorurus strongylocephalus | Commercial |
| Scaridae | Hipposcarus hairid | Commercial |
| Scaridae | Hipposcarus harid | Commercial |
| Scaridae | Leptoscarus vaigiensis | Commercial |
| Scaridae | Scarus atrilunula | Commercial |
| Scaridae | Scarus caudofasciatus | Commercial |
| Scaridae | Scarus falcipinnis | Commercial |
| Scaridae | Scarus festivus | Commercial |
| Scaridae | Scarus frenatus | Commercial |
| Scaridae | Scarus ghobban | Commercial |
| Scaridae | Scarus globiceps | Commercial |
| Scaridae | Scarus niger | Commercial |
| Scaridae | Scarus psittacus | Commercial |
| Scaridae | Scarus rubroviolaceus | Commercial |
| Scaridae | Scarus russelii | Commercial |
| Scaridae | Scarus scaber | Commercial |
| Scaridae | Scarus sordidus | Commercial |
| Scaridae | Scarus tricolor | Commercial |
| Scaridae | Scarus virdifucatus | Commercial |
| Scaridae | Scarus viridifucatus | Commercial |
| Sciaenidae | Johnius dorsalis | Commercial |
| Sciaenidae | Otolithes ruber | Commercial |
| Scombridae | Euthynnus affinis | Commercial |
| Scombridae | Gymnosarda unicolor | Commercial |
| Scombridae | Rastrelliger kanagurta | Commercial |
| Scombridae | Scomberomorus commerson | Commercial |
| Scombridae | Scomberomorus plurilineatus | Commercial |
| Scombridae | Thunnus albacares | Commercial |
| Scombridae | Thunnus tonggol | Commercial |
| Scorpaenidae | Dendrochirus brachypterus | Non-commercial |
| Scorpaenidae | Dendrochirus zebra | Non-commercial |
| Scorpaenidae | Parascorpaena mcadamsi | Non-commercial |
| Scorpaenidae | Parascorpaena mossambica | Non-commercial |
| Scorpaenidae | Pterois antennata | Non-commercial |
| Scorpaenidae | Pterois miles | Non-commercial |
| Scorpaenidae | Pterois milesi | Non-commercial |
| Scorpaenidae | Pterois mombasae | Non-commercial |
| Scorpaenidae | Pterois radiata | Non-commercial |
| Scorpaenidae | Pterois russellii | Non-commercial |
| Scorpaenidae | Rhinopias frondosa | Non-commercial |
| Scorpaenidae | Scorpaenodes albaiensis | Non-commercial |
| Scorpaenidae | Scorpaenodes corallinus | Non-commercial |
| Scorpaenidae | Scorpaenodes guamensis | Non-commercial |
| Scorpaenidae | Scorpaenodes hirsutus | Non-commercial |
| Scorpaenidae | Scorpaenodes kelloggi | Non-commercial |
| Scorpaenidae | Scorpaenodes minor | Non-commercial |
| Scorpaenidae | Scorpaenodes parvipinnis | Non-commercial |
| Scorpaenidae | Scorpaenodes varipinnis | Non-commercial |
| Scorpaenidae | Scorpaenopsis diabolus | Non-commercial |
| Scorpaenidae | Scorpaenopsis gibbosa | Non-commercial |
| Scorpaenidae | Scorpaenopsis oxycephala | Non-commercial |
| Scorpaenidae | Scorpaenopsis possi | Non-commercial |
| Scorpaenidae | Sebastapistes cyanostigma | Non-commercial |
| Scorpaenidae | Sebastapistes mauritiana | Non-commercial |
| Scorpaenidae | Sebastapistes strongia | Non-commercial |
| Scorpaenidae | Taenianotus triacanthus | Non-commercial |
| Serranidae | Aethaloperca rogaa | Commercial |
| Serranidae | Anyparodon leucogrammicus | Commercial |
| Serranidae | Anyperodon leucogrammicus | Commercial |
| Serranidae | Aporops bilinearis | Commercial |
| Serranidae | Belonoperca chabanaudi | Commercial |
| Serranidae | Cephalopholis argus | Commercial |
| Serranidae | Cephalopholis aurantia | Commercial |
| Serranidae | Cephalopholis boenak | Commercial |
| Serranidae | Cephalopholis leopardus | Commercial |
| Serranidae | Cephalopholis miniata | Commercial |
| Serranidae | Cephalopholis nigripinnis | Commercial |
| Serranidae | Cephalopholis sexmaculata | Commercial |
| Serranidae | Cephalopholis sonnerati | Commercial |
| Serranidae | Cephalopholis spiloparaea | Commercial |
| Serranidae | Dermatolepis striolata | Commercial |
| Serranidae | Epinephelus areolatus | Commercial |
| Serranidae | Epinephelus caeruleopunctatus | Commercial |
| Serranidae | Epinephelus chlorostigma | Commercial |
| Serranidae | Epinephelus coeruleopunctatus | Commercial |
| Serranidae | Epinephelus coioides | Commercial |
| Serranidae | Epinephelus epistictus | Commercial |
| Serranidae | Epinephelus fasciatus | Commercial |
| Serranidae | Epinephelus flavocaeruleus | Commercial |
| Serranidae | Epinephelus fuscoguttatus | Commercial |
| Serranidae | Epinephelus hexagonatus | Commercial |
| Serranidae | Epinephelus lanceolatus | Commercial |
| Serranidae | Epinephelus longispinis | Commercial |
| Serranidae | Epinephelus macrospilos | Commercial |
| Serranidae | Epinephelus malabaricus | Commercial |
| Serranidae | Epinephelus merra | Commercial |
| Serranidae | Epinephelus miliaris | Commercial |
| Serranidae | Epinephelus multinotatus | Commercial |
| Serranidae | Epinephelus ongus | Commercial |
| Serranidae | Epinephelus polyphekadion | Commercial |
| Serranidae | Epinephelus rivulatus | Commercial |
| Serranidae | Epinephelus spilotoceps | Commercial |
| Serranidae | Epinephelus tauvina | Commercial |
| Serranidae | Epinephelus tukula | Commercial |
| Serranidae | Epinephelus undulosus | Commercial |
| Serranidae | Gracila albomarginata | Commercial |
| Serranidae | Grammistops ocellatus | Non-commercial |
| Serranidae | Liopropoma africanum | Commercial |
| Serranidae | Liopropoma susumi | Commercial |
| Serranidae | Nemanthias carberryi | Non-commercial |
| Serranidae | Plectranthias longimanus | Non-commercial |
| Serranidae | Plectropomus laevis | Commercial |
| Serranidae | Plectropomus pessuliferus | Commercial |
| Serranidae | Plectropomus punctatus | Commercial |
| Serranidae | Pogonoperca ocellata | Commercial |
| Anthiadidae | Pseudanthias cooperi | Non-commercial |
| Anthiadidae | Pseudanthias evansi | Non-commercial |
| Anthiadidae | Pseudanthias squamipinnis | Non-commercial |
| Serranidae | Pseudogramma polyacanthus | Commercial |
| Serranidae | Suttonia suttoni | Commercial |
| Serranidae | Variola albimarginata | Commercial |
| Serranidae | Variola louti | Commercial |
| Siganidae | Siganus argenteus | Commercial |
| Siganidae | Siganus canaliculatus | Commercial |
| Siganidae | Siganus luridus | Commercial |
| Siganidae | Siganus stellatus | Commercial |
| Siganidae | Siganus sutor | Commercial |
| Sillaginidae | Sillago sihama | Commercial |
| Soleidae | Aseraggodes diringeri | Non-commercial |
| Soleidae | Pardachirus marmoratus | Non-commercial |
| Solenostomidae | Solenostomus cyanopterus | Non-commercial |
| Sparidae | Acanthopagrus bifasciatus | Commercial |
| Sparidae | Cheimerius nufar | Commercial |
| Sparidae | Crenidens crenidens | Commercial |
| Sparidae | Polysteganus coeruleopunctatus | Commercial |
| Sparidae | Rhabdosargus sarba | Commercial |
| Sphyraenidae | Sphyraena acutipinnis | Commercial |
| Sphyraenidae | Sphyraena barracuda | Commercial |
| Sphyraenidae | Sphyraena flavicauda | Commercial |
| Sphyraenidae | Sphyraena forsteri | Commercial |
| Sphyraenidae | Sphyraena jello | Commercial |
| Sphyraenidae | Sphyraena obtusata | Commercial |
| Sphyraenidae | Sphyraena pinguis | Commercial |
| Sphyraenidae | Sphyraena putnamae | Commercial |
| Sphyraenidae | Sphyraena qenie | Commercial |
| Sphyrnidae | Sphyrna lewini | Commercial |
| Sphyrnidae | Sphyrna mokarran | Commercial |
| Stegostomatidae | Stegostoma fasciatum | Commercial |
| Synanceiidae | Inimicus filamentosus | Non-commercial |
| Synanceiidae | Synanceia verrucosa | Non-commercial |
| Syngnathidae | Acentronura tentaculata | Non-commercial |
| Syngnathidae | Bryx analicarens | Non-commercial |
| Syngnathidae | Bulbonaricus brucei | Non-commercial |
| Syngnathidae | Bulbonaricus davaoensis | Non-commercial |
| Syngnathidae | Choeroichthys brachysoma | Non-commercial |
| Syngnathidae | Choeroichthys sculptus | Non-commercial |
| Syngnathidae | Corythoichthys flavofasciatus | Non-commercial |
| Syngnathidae | Corythoichthys haematopterus | Non-commercial |
| Syngnathidae | Cosmocampus banneri | Non-commercial |
| Syngnathidae | Doryrhamphus excisus | Non-commercial |
| Syngnathidae | Halicampus mataafae | Non-commercial |
| Syngnathidae | Hippocampus borboriensis | Non-commercial |
| Syngnathidae | Hippocampus camelopardalis | Non-commercial |
| Syngnathidae | Hippocampus histrix | Non-commercial |
| Syngnathidae | Micrognathus andersonii | Non-commercial |
| Syngnathidae | Nannocampus pictus | Non-commercial |
| Syngnathidae | Phoxocampus belcheri | Non-commercial |
| Syngnathidae | Syngnathoides biaculeatus | Non-commercial |
| Syngnathidae | Trachyrhamphus bicoarctatus | Non-commercial |
| Syngnathidae | Trachyrhamphus longirostris | Non-commercial |
| Synodontidae | Saurida gracilis | Non-commercial |
| Synodontidae | Synodus binotatus | Non-commercial |
| Synodontidae | Synodus dermatogenys | Non-commercial |
| Synodontidae | Synodus doaki | Non-commercial |
| Synodontidae | Synodus jaculum | Non-commercial |
| Synodontidae | Synodus variegatus | Non-commercial |
| Synodontidae | Trachinocephalu myops | Non-commercial |
| Terapontidae | Terapon jarbua | Commercial |
| Terapontidae | Terapon puta | Commercial |
| Tetraodontidae | Arothron hispidus | Non-commercial |
| Tetraodontidae | Arothron immaculatus | Non-commercial |
| Tetraodontidae | Arothron mappa | Non-commercial |
| Tetraodontidae | Arothron meleagris | Non-commercial |
| Tetraodontidae | Arothron nigropunctatus | Non-commercial |
| Tetraodontidae | Arothron stellatus | Non-commercial |
| Tetraodontidae | Canthigaster amboinensis | Non-commercial |
| Tetraodontidae | Canthigaster bennetti | Non-commercial |
| Tetraodontidae | Canthigaster coronata | Non-commercial |
| Tetraodontidae | Canthigaster janthinoptera | Non-commercial |
| Tetraodontidae | Canthigaster smithae | Non-commercial |
| Tetraodontidae | Canthigaster solandri | Non-commercial |
| Tetraodontidae | Canthigaster valentini | Non-commercial |
| Tetraodontidae | Torquigener flavimaculosus | Non-commercial |
| Tetrarogidae | Ablabys binotatus | Non-commercial |
| Torpedinidae | Torpedo fuscomaculata | Non-commercial |
| Trichiuridae | Trichiurus lepturus | Commercial |
| Tripterygiidae | Enneapterygius abeli | Non-commercial |
| Tripterygiidae | Enneapterygius destai | Non-commercial |
| Tripterygiidae | Enneapterygius elegans | Non-commercial |
| Tripterygiidae | Enneapterygius fasciatus | Non-commercial |
| Tripterygiidae | Enneapterygius pusillus | Non-commercial |
| Tripterygiidae | Enneapterygius tutuilae | Non-commercial |
| Tripterygiidae | Enneapterygius ventermaculus | Non-commercial |
| Tripterygiidae | Helcogramma fuscopinna | Non-commercial |
| Tripterygiidae | Helcogramma obtusirostre | Non-commercial |
| Tripterygiidae | Norfolkia brachylepis | Non-commercial |
| Xenisthmidae | Xenisthmus africanus | Non-commercial |
| Zanclidae | Zanclus cornutus | Non-commercial |

Supplementary Table 3. Numbers of fish species in Kenya, captured in the studied fishery, classified as commercial and noncommercial. Missing in reserve census, missing in catch, and shared common.

|  |  |  |  | Fish catch | | Marine reserve | | |
| --- | --- | --- | --- | --- | --- | --- | --- | --- |
| Family | Species | Classification | Status in reserve and catch | Samples (n) | % of total | | Samples (n) | % of total |
| Acanthuridae | Naso hexacanthus | Commercial | Missing in Marine reserve | 5 | 0.2 | | 0 | 0 |
|  | Acanthurus dussumieri | Commercial | Shared common | 4 | 0.2 | | 3 | 0 |
|  | Acanthurus leucosternon | Commercial | Shared common | 3 | 0.1 | | 17 | 0.1 |
|  | Naso annulatus | Commercial | Shared common | 2 | 0.1 | | 112 | 0.5 |
|  | Acanthurus nigricauda | Commercial | Shared common | 2 | 0.1 | | 7 | 0 |
|  | Naso fageni | Commercial | Missing in Marine reserve | 2 | 0.1 | | 0 | 0 |
|  | Ctenochaetus striatus | Commercial | Shared common | 1 | 0 | | 13 | 0.1 |
|  | Naso brachycentron | Commercial | Missing in Marine reserve | 1 | 0 | | 0 | 0 |
|  | Ctenochaetus strigosus | Commercial | Missing in Catch | 0 | 0 | | 109 | 0.5 |
|  | Ctenochaetus binotatus | Commercial | Missing in Catch | 0 | 0 | | 91 | 0.4 |
|  | Zebrasoma scopas | Commercial | Missing in Catch | 0 | 0 | | 76 | 0.4 |
|  | Acanthurus nigrofuscus | Commercial | Missing in Catch | 0 | 0 | | 33 | 0.2 |
|  | Naso unicornis | Commercial | Missing in Catch | 0 | 0 | | 14 | 0.1 |
|  | Acanthurus tennenti | Commercial | Missing in Catch | 0 | 0 | | 9 | 0 |
|  | Naso tuberosus | Commercial | Missing in Catch | 0 | 0 | | 3 | 0 |
|  | Naso elegans | Commercial | Missing in Catch | 0 | 0 | | 1 | 0 |
|  | Paracanthurus hepatus | Commercial | Missing in Catch | 0 | 0 | | 1 | 0 |
|  | Zebrasoma veliferum | Commercial | Missing in Catch | 0 | 0 | | 1 | 0 |
| Aetobatidae | Aetobatus narinari | Commercial | Missing in Marine reserve | 15 | 0.7 | | 0 | 0 |
| Apogonidae | Cheilodipterus arabicus | Non-commercial | Missing in Marine reserve | 21 | 0.9 | | 0 | 0 |
|  | Taeniamia mozambiquensis | Non-commercial | Missing in Marine reserve | 7 | 0.3 | | 0 | 0 |
| Ariidae | Plicofollis polystaphylodon | Non-commercial | Missing in Marine reserve | 1 | 0 | | 0 | 0 |
| Aulostomidae | Aulostomus chinensis | Non-commercial | Missing in Marine reserve | 1 | 0 | | 0 | 0 |
| Balistidae | Balistapus undulatus | Non-commercial | Missing in Catch | 0 | 0 | | 30 | 0.1 |
|  | Sufflamen chrysopterum | Non-commercial | Missing in Catch | 0 | 0 | | 28 | 0.1 |
|  | Balistoides viridescens | Non-commercial | Missing in Catch | 0 | 0 | | 1 | 0 |
|  | Strongylura leiura | Commercial | Missing in Marine reserve | 9 | 0.4 | | 0 | 0 |
|  | Tylosurus crocodilus | Commercial | Missing in Marine reserve | 8 | 0.4 | | 0 | 0 |
| Caesionidae | Pterocaesio chrysozona | Commercial | Missing in Marine reserve | 18 | 0.8 | | 0 | 0 |
|  | Caesio teres | Commercial | Missing in Marine reserve | 7 | 0.3 | | 0 | 0 |
| Carangidae | Atule mate | Commercial | Missing in Marine reserve | 43 | 1.9 | | 0 | 0 |
|  | Carangoides malabaricus | Commercial | Missing in Marine reserve | 32 | 1.4 | | 0 | 0 |
|  | Alepes djedaba | Commercial | Missing in Marine reserve | 24 | 1.1 | | 0 | 0 |
|  | Scomberoides tol | Commercial | Missing in Marine reserve | 12 | 0.5 | | 0 | 0 |
|  | Trachurus indicus | Commercial | Missing in Marine reserve | 12 | 0.5 | | 0 | 0 |
|  | Carangoides gymnostethus | Commercial | Missing in Marine reserve | 9 | 0.4 | | 0 | 0 |
|  | Decapterus macrosoma | Commercial | Missing in Marine reserve | 8 | 0.4 | | 0 | 0 |
|  | Megalaspis cordyla | Commercial | Missing in Marine reserve | 6 | 0.3 | | 0 | 0 |
|  | Elagatis bipinnulata | Commercial | Missing in Marine reserve | 4 | 0.2 | | 0 | 0 |
|  | Carangoides ciliarius | Commercial | Missing in Marine reserve | 3 | 0.1 | | 0 | 0 |
|  | Carangoides equula | Commercial | Missing in Marine reserve | 3 | 0.1 | | 0 | 0 |
|  | Carangoides oblongus | Commercial | Missing in Marine reserve | 3 | 0.1 | | 0 | 0 |
|  | Decapterus kurroides | Commercial | Missing in Marine reserve | 3 | 0.1 | | 0 | 0 |
|  | Gnathanodon speciosus | Commercial | Missing in Marine reserve | 3 | 0.1 | | 0 | 0 |
|  | Scomberoides commersonnianus | Commercial | Missing in Marine reserve | 1 | 0 | | 0 | 0 |
|  | Caranx melampygus | Commercial | Missing in Catch | 0 | 0 | | 10 | 0 |
| Chaetodontidae | Chaetodon auriga | Non-commercial | Shared common | 2 | 0.1 | | 18 | 0.1 |
|  | Chaetodon trifasciatus | Non-commercial | Missing in Catch | 0 | 0 | | 47 | 0.2 |
|  | Chaetodon trifascialis | Non-commercial | Missing in Catch | 0 | 0 | | 20 | 0.1 |
|  | Chaetodon guttatissimus | Non-commercial | Missing in Catch | 0 | 0 | | 15 | 0.1 |
|  | Chaetodon falcula | Non-commercial | Missing in Catch | 0 | 0 | | 8 | 0 |
|  | Chaetodon lunula | Non-commercial | Missing in Catch | 0 | 0 | | 8 | 0 |
|  | Chaetodon melannotus | Non-commercial | Missing in Catch | 0 | 0 | | 7 | 0 |
|  | Chaetodon xanthocephalus | Non-commercial | Missing in Catch | 0 | 0 | | 4 | 0 |
|  | Chaetodon zanzibarensis | Non-commercial | Missing in Catch | 0 | 0 | | 2 | 0 |
|  | Chaetodon bennetti | Non-commercial | Missing in Catch | 0 | 0 | | 1 | 0 |
|  | Chaetodon lineolatus | Non-commercial | Missing in Catch | 0 | 0 | | 1 | 0 |
|  | Chaetodon meyeri | Non-commercial | Missing in Catch | 0 | 0 | | 1 | 0 |
|  | Forcipiger flavissimus | Non-commercial | Missing in Catch | 0 | 0 | | 1 | 0 |
| Chirocentridae | Chirocentrus dorab | Commercial | Missing in Marine reserve | 2 | 0.1 | | 0 | 0 |
| Dasyatidae | Maculabatis ambigua | Commercial | Missing in Marine reserve | 10 | 0.4 | | 0 | 0 |
|  | Himantura uarnak | Commercial | Missing in Marine reserve | 9 | 0.4 | | 0 | 0 |
|  | Taeniura lymma | Commercial | Missing in Marine reserve | 8 | 0.4 | | 0 | 0 |
| Diodontidae | Diodon holocanthus | Non-commercial | Missing in Catch | 0 | 0 | | 1 | 0 |
|  | Diodon hystrix | Non-commercial | Missing in Catch | 0 | 0 | | 1 | 0 |
| Dorosomatidae | Sardinella albella | Commercial | Missing in Marine reserve | 9 | 0.4 | | 0 | 0 |
|  | Sardinella neglecta | Commercial | Missing in Marine reserve | 9 | 0.4 | | 0 | 0 |
|  | Sardinella longiceps | Commercial | Missing in Marine reserve | 3 | 0.1 | | 0 | 0 |
| Engraulidae | Encrasicholina heteroloba | Commercial | Missing in Marine reserve | 4 | 0.2 | | 0 | 0 |
| Ephippidae | Platax teira | Non-commercial | Missing in Marine reserve | 3 | 0.1 | | 0 | 0 |
| Gerreidae | Gerres oyena | Commercial | Missing in Marine reserve | 161 | 7 | | 0 | 0 |
|  | Gerres longirostris | Commercial | Missing in Marine reserve | 31 | 1.4 | | 0 | 0 |
|  | Gerres oblongus | Commercial | Missing in Marine reserve | 18 | 0.8 | | 0 | 0 |
| Haemulidae | Plectorhinchus sordidus | Commercial | Missing in Marine reserve | 12 | 0.5 | | 0 | 0 |
|  | Plectorhinchus chubbi | Commercial | Missing in Marine reserve | 9 | 0.4 | | 0 | 0 |
|  | Plectorhinchus gaterinus | Commercial | Shared common | 4 | 0.2 | | 36 | 0.2 |
|  | Plectorhinchus vittatus | Commercial | Missing in Marine reserve | 4 | 0.2 | | 0 | 0 |
|  | Plectorhinchus flavomaculatus | Commercial | Shared common | 3 | 0.1 | | 2 | 0 |
|  | Plectorhinchus schotaf | Commercial | Missing in Marine reserve | 3 | 0.1 | | 0 | 0 |
|  | Plectorhinchus centurio | Commercial | Missing in Marine reserve | 1 | 0 | | 0 | 0 |
|  | Plectorhinchus plagiodesmus | Commercial | Missing in Catch | 0 | 0 | | 1 | 0 |
| Hemiramphidae | Hyporhamphus affinis | Commercial | Missing in Marine reserve | 25 | 1.1 | | 0 | 0 |
|  | Hemiramphus far | Commercial | Missing in Marine reserve | 12 | 0.5 | | 0 | 0 |
|  | Hemiramphus marginatus | Commercial | Missing in Marine reserve | 8 | 0.4 | | 0 | 0 |
|  | Hyporhamphus dussumieri | Commercial | Missing in Marine reserve | 3 | 0.1 | | 0 | 0 |
| Holocentridae | Myripristis berndti | Non-commercial | Shared common | 4 | 0.2 | | 105 | 0.5 |
|  | Sargocentron diadema | Non-commercial | Shared common | 4 | 0.2 | | 4 | 0 |
|  | Myripristis murdjan | Non-commercial | Shared common | 3 | 0.1 | | 4 | 0 |
|  | Sargocentron caudimaculatum | Non-commercial | Shared common | 2 | 0.1 | | 7 | 0 |
|  | Sargocentron spiniferum | Non-commercial | Missing in Marine reserve | 2 | 0.1 | | 0 | 0 |
|  | Sargocentron praslin | Non-commercial | Missing in Marine reserve | 1 | 0 | | 0 | 0 |
|  | Neoniphon sammara | Non-commercial | Missing in Catch | 0 | 0 | | 339 | 1.6 |
|  | Myripristis seychellensis | Non-commercial | Missing in Catch | 0 | 0 | | 308 | 1.5 |
|  | Myripristis adusta | Non-commercial | Missing in Catch | 0 | 0 | | 6 | 0 |
| Labridae | Cheilio inermis | Commercial | Shared common | 9 | 0.4 | | 4 | 0 |
|  | Cheilinus trilobatus | Commercial | Shared common | 4 | 0.2 | | 4 | 0 |
|  | Halichoeres hortulanus | Commercial | Shared common | 3 | 0.1 | | 19 | 0.1 |
|  | Gomphosus caeruleus | Commercial | Shared common | 1 | 0 | | 50 | 0.2 |
|  | Thalassoma lunare | Commercial | Shared common | 1 | 0 | | 5 | 0 |
|  | Anampses caeruleopunctatus | Commercial | Shared common | 1 | 0 | | 1 | 0 |
|  | Bodianus bilunulatus | Commercial | Shared common | 1 | 0 | | 1 | 0 |
|  | Thalassoma amblycephalum | Commercial | Missing in Catch | 0 | 0 | | 88 | 0.4 |
|  | Thalassoma hebraicum | Commercial | Missing in Catch | 0 | 0 | | 71 | 0.3 |
|  | Labroides dimidiatus | Non-commercial | Missing in Catch | 0 | 0 | | 59 | 0.3 |
|  | Labrichthys unilineatus | Non-commercial | Missing in Catch | 0 | 0 | | 27 | 0.1 |
|  | Bodianus axillaris | Non-commercial | Missing in Catch | 0 | 0 | | 23 | 0.1 |
|  | Labroides bicolor | Non-commercial | Missing in Catch | 0 | 0 | | 20 | 0.1 |
|  | Thalassoma hardwicke | Commercial | Missing in Catch | 0 | 0 | | 20 | 0.1 |
|  | Anampses twistii | Commercial | Missing in Catch | 0 | 0 | | 14 | 0.1 |
|  | Anampses meleagrides | Commercial | Missing in Catch | 0 | 0 | | 11 | 0.1 |
|  | Stethojulis albovittata | Non-commercial | Missing in Catch | 0 | 0 | | 11 | 0.1 |
|  | Hemigymnus melapterus | Commercial | Missing in Catch | 0 | 0 | | 10 | 0 |
|  | Cheilinus oxycephalus | Commercial | Missing in Catch | 0 | 0 | | 7 | 0 |
|  | Oxycheilinus digramma | Non-commercial | Missing in Catch | 0 | 0 | | 7 | 0 |
|  | Pseudocheilinus hexataenia | Non-commercial | Missing in Catch | 0 | 0 | | 7 | 0 |
|  | Cheilinus fasciatus | Commercial | Missing in Catch | 0 | 0 | | 5 | 0 |
|  | Hemigymnus fasciatus | Commercial | Missing in Catch | 0 | 0 | | 5 | 0 |
|  | Coris aygula | Commercial | Missing in Catch | 0 | 0 | | 4 | 0 |
|  | Halichoeres scapularis | Commercial | Missing in Catch | 0 | 0 | | 4 | 0 |
|  | Coris formosa | Commercial | Missing in Catch | 0 | 0 | | 2 | 0 |
|  | Cheilinus undulatus | Commercial | Missing in Catch | 0 | 0 | | 1 | 0 |
|  | Epibulus insidiator | Non-commercial | Missing in Catch | 0 | 0 | | 1 | 0 |
|  | Halichoeres cosmetus | Non-commercial | Missing in Catch | 0 | 0 | | 1 | 0 |
|  | Novaculichthys taeniourus | Commercial | Missing in Catch | 0 | 0 | | 1 | 0 |
| Leiognathidae | Leiognathus berbis | Commercial | Missing in Marine reserve | 3 | 0.1 | | 0 | 0 |
| Lethrinidae | Lethrinus lentjan | Commercial | Missing in Marine reserve | 232 | 10.2 | | 0 | 0 |
|  | Lethrinus harak | Commercial | Missing in Marine reserve | 38 | 1.7 | | 0 | 0 |
|  | Lethrinus borbonicus | Commercial | Missing in Marine reserve | 35 | 1.5 | | 0 | 0 |
|  | Lethrinus mahsena | Commercial | Missing in Marine reserve | 28 | 1.2 | | 0 | 0 |
|  | Lethrinus olivaceus | Commercial | Missing in Marine reserve | 23 | 1 | | 0 | 0 |
|  | Lethrinus rubrioperculatus | Commercial | Missing in Marine reserve | 15 | 0.7 | | 0 | 0 |
|  | Lethrinus obsoletus | Commercial | Shared common | 13 | 0.6 | | 154 | 0.7 |
|  | Lethrinus microdon | Commercial | Missing in Marine reserve | 13 | 0.6 | | 0 | 0 |
|  | Monotaxis grandoculis | Commercial | Missing in Marine reserve | 6 | 0.3 | | 0 | 0 |
|  | Lethrinus nebulosus | Commercial | Missing in Marine reserve | 5 | 0.2 | | 0 | 0 |
|  | Lethrinus variegatus | Commercial | Missing in Marine reserve | 3 | 0.1 | | 0 | 0 |
|  | Gnathodentex aureolineatus | Commercial | Missing in Catch | 0 | 0 | | 195 | 0.9 |
|  | Lethrinus erythropterus | Commercial | Missing in Catch | 0 | 0 | | 1 | 0 |
| Lutjanidae | Lutjanus fulviflamma | Commercial | Shared common | 116 | 5.1 | | 412 | 1.9 |
|  | Aphareus furca | Commercial | Missing in Marine reserve | 81 | 3.5 | | 0 | 0 |
|  | Lutjanus lutjanus | Commercial | Shared common | 35 | 1.5 | | 480 | 2.3 |
|  | Lutjanus kasmira | Commercial | Shared common | 20 | 0.9 | | 1118 | 5.3 |
|  | Lutjanus argentimaculatus | Commercial | Shared common | 20 | 0.9 | | 1 | 0 |
|  | Lutjanus erythropterus | Commercial | Missing in Marine reserve | 5 | 0.2 | | 0 | 0 |
|  | Lutjanus gibbus | Commercial | Shared common | 1 | 0 | | 39 | 0.2 |
|  | Aprion virescens | Commercial | Missing in Marine reserve | 1 | 0 | | 0 | 0 |
|  | Lutjanus monostigma | Commercial | Missing in Catch | 0 | 0 | | 36 | 0.2 |
|  | Lutjanus bohar | Commercial | Missing in Catch | 0 | 0 | | 1 | 0 |
| Monacanthidae | Cantherhines pardalis | Non-commercial | Missing in Catch | 0 | 0 | | 7 | 0 |
|  | Amanses scopas | Non-commercial | Missing in Catch | 0 | 0 | | 6 | 0 |
|  | Oxymonacanthus longirostris | Non-commercial | Missing in Catch | 0 | 0 | | 5 | 0 |
|  | Cantherhines fronticinctus | Non-commercial | Missing in Catch | 0 | 0 | | 2 | 0 |
|  | Pervagor janthinosoma | Non-commercial | Missing in Catch | 0 | 0 | | 1 | 0 |
| Monodactylidae | Monodactylus argenteus | Non-commercial | Missing in Marine reserve | 2 | 0.1 | | 0 | 0 |
| Mullidae | Parupeneus macronemus | Commercial | Missing in Marine reserve | 37 | 1.6 | | 0 | 0 |
|  | Parupeneus heptacanthus | Commercial | Missing in Marine reserve | 36 | 1.6 | | 0 | 0 |
|  | Upeneus sulphureus | Commercial | Missing in Marine reserve | 14 | 0.6 | | 0 | 0 |
|  | Parupeneus barberinus | Commercial | Shared common | 13 | 0.6 | | 48 | 0.2 |
|  | Upeneus vittatus | Commercial | Missing in Marine reserve | 12 | 0.5 | | 0 | 0 |
|  | Parupeneus cyclostomus | Commercial | Shared common | 11 | 0.5 | | 1 | 0 |
|  | Parupeneus indicus | Commercial | Missing in Marine reserve | 9 | 0.4 | | 0 | 0 |
|  | Upeneus saiab | Commercial | Missing in Marine reserve | 5 | 0.2 | | 0 | 0 |
|  | Mulloidichthys vanicolensis | Commercial | Shared common | 3 | 0.1 | | 61 | 0.3 |
|  | Upeneus moluccensis. | Commercial | Missing in Marine reserve | 2 | 0.1 | | 0 | 0 |
|  | Parupeneus rubescens | Commercial | Missing in Marine reserve | 1 | 0 | | 0 | 0 |
|  | Upeneus margarethae | Commercial | Missing in Marine reserve | 1 | 0 | | 0 | 0 |
|  | Mulloidichthys flavolineatus | Commercial | Missing in Catch | 0 | 0 | | 4 | 0 |
| Myliobatidae | Aetobatus ocellatus | Commercial | Missing in Marine reserve | 1 | 0 | | 0 | 0 |
| Nemipteridae | Scolopsis bimaculata | Commercial | Missing in Marine reserve | 45 | 2 | | 0 | 0 |
|  | Scolopsis ghanam | Commercial | Missing in Marine reserve | 6 | 0.3 | | 0 | 0 |
| Pempheridae | Pempheris adusta | Non-commercial | Missing in Marine reserve | 2 | 0.1 | | 0 | 0 |
| Platycephalidae | Papilloculiceps longiceps | Non-commercial | Missing in Marine reserve | 2 | 0.1 | | 0 | 0 |
| Pomacanthidae | Pomacanthus imperator | Non-commercial | Shared common | 2 | 0.1 | | 5 | 0 |
|  | Centropyge multispinis | Non-commercial | Missing in Catch | 0 | 0 | | 106 | 0.5 |
|  | Pygoplites diacanthus | Non-commercial | Missing in Catch | 0 | 0 | | 3 | 0 |
|  | Pomacanthus semicirculatus | Non-commercial | Missing in Catch | 0 | 0 | | 1 | 0 |
| Pomacentridae | Abudefduf vaigiensis | Non-commercial | Missing in Marine reserve | 1 | 0 | | 0 | 0 |
|  | Chromis dimidiata | Non-commercial | Missing in Catch | 0 | 0 | | 11220 | 52.9 |
|  | Chromis ternatensis | Non-commercial | Missing in Catch | 0 | 0 | | 2083 | 9.8 |
|  | Chromis viridis | Non-commercial | Missing in Catch | 0 | 0 | | 1602 | 7.6 |
|  | Chromis nigrura | Non-commercial | Missing in Catch | 0 | 0 | | 599 | 2.8 |
|  | Plectroglyphidodon lacrymatus | Non-commercial | Missing in Catch | 0 | 0 | | 104 | 0.5 |
|  | Chromis opercularis | Non-commercial | Missing in Catch | 0 | 0 | | 101 | 0.5 |
|  | Chromis weberi | Non-commercial | Missing in Catch | 0 | 0 | | 100 | 0.5 |
|  | Dascyllus trimaculatus | Non-commercial | Missing in Catch | 0 | 0 | | 83 | 0.4 |
|  | Plectroglyphidodon dickii | Non-commercial | Missing in Catch | 0 | 0 | | 71 | 0.3 |
|  | Dascyllus aruanus | Non-commercial | Missing in Catch | 0 | 0 | | 31 | 0.1 |
|  | Amphiprion akallopisos | Non-commercial | Missing in Catch | 0 | 0 | | 29 | 0.1 |
|  | Pomacentrus sulfureus | Non-commercial | Missing in Catch | 0 | 0 | | 26 | 0.1 |
|  | Abudefduf sexfasciatus | Non-commercial | Missing in Catch | 0 | 0 | | 19 | 0.1 |
|  | Chromis agilis | Non-commercial | Missing in Catch | 0 | 0 | | 12 | 0.1 |
|  | Abudefduf sparoides | Non-commercial | Missing in Catch | 0 | 0 | | 8 | 0 |
|  | Amblyglyphidodon leucogaster | Non-commercial | Missing in Catch | 0 | 0 | | 7 | 0 |
|  | Amphiprion allardi | Non-commercial | Missing in Catch | 0 | 0 | | 7 | 0 |
|  | Plectroglyphidodon johnstonianus | Non-commercial | Missing in Catch | 0 | 0 | | 5 | 0 |
|  | Stegastes nigricans | Non-commercial | Missing in Catch | 0 | 0 | | 5 | 0 |
|  | Neoglyphidodon melas | Non-commercial | Missing in Catch | 0 | 0 | | 4 | 0 |
|  | Pomacentrus caeruleus | Non-commercial | Missing in Catch | 0 | 0 | | 2 | 0 |
|  | Pomacentrus baenschi | Non-commercial | Missing in Catch | 0 | 0 | | 1 | 0 |
|  | Stegastes fasciolatus | Non-commercial | Missing in Catch | 0 | 0 | | 1 | 0 |
| Priacanthidae | Priacanthus hamrur | Commercial | Missing in Marine reserve | 5 | 0.2 | | 0 | 0 |
| Scaridae | Leptoscarus vaigiensis | Commercial | Missing in Marine reserve | 73 | 3.2 | | 0 | 0 |
|  | Scarus ghobban | Commercial | Shared common | 61 | 2.7 | | 3 | 0 |
|  | Calotomus carolinus | Commercial | Shared common | 16 | 0.7 | | 19 | 0.1 |
|  | Scarus psittacus | Commercial | Shared common | 5 | 0.2 | | 15 | 0.1 |
|  | Scarus rubroviolaceus | Commercial | Shared common | 5 | 0.2 | | 2 | 0 |
|  | Scarus globiceps | Commercial | Missing in Marine reserve | 5 | 0.2 | | 0 | 0 |
|  | Scarus frenatus | Commercial | Shared common | 2 | 0.1 | | 22 | 0.1 |
|  | Chlorurus gibbus | Commercial | Missing in Marine reserve | 2 | 0.1 | | 0 | 0 |
|  | Scarus falcipinnis | Commercial | Missing in Marine reserve | 1 | 0 | | 0 | 0 |
|  | Scarus sordidus | Commercial | Missing in Catch | 0 | 0 | | 99 | 0.5 |
|  | Scarus tricolor | Commercial | Missing in Catch | 0 | 0 | | 27 | 0.1 |
|  | Scarus niger | Commercial | Missing in Catch | 0 | 0 | | 12 | 0.1 |
|  | Hipposcarus harid | Commercial | Missing in Catch | 0 | 0 | | 7 | 0 |
|  | Scarus atrilunula | Commercial | Missing in Catch | 0 | 0 | | 7 | 0 |
|  | Scarus viridifucatus | Commercial | Missing in Catch | 0 | 0 | | 7 | 0 |
|  | Cetoscarus bicolor | Commercial | Missing in Catch | 0 | 0 | | 1 | 0 |
| Scombridae | Rastrelliger kanagurta | Commercial | Missing in Marine reserve | 26 | 1.1 | | 0 | 0 |
|  | Euthynnus affinis | Commercial | Missing in Marine reserve | 12 | 0.5 | | 0 | 0 |
|  | Scomberomorus plurilineatus | Commercial | Missing in Marine reserve | 4 | 0.2 | | 0 | 0 |
|  | Scomberomorus commerson | Commercial | Missing in Marine reserve | 3 | 0.1 | | 0 | 0 |
|  | Thunnus albacares | Commercial | Missing in Marine reserve | 1 | 0 | | 0 | 0 |
| Serranidae | Cephalopholis boenak | Commercial | Shared common | 10 | 0.4 | | 3 | 0 |
|  | Epinephelus rivulatus | Commercial | Missing in Marine reserve | 8 | 0.4 | | 0 | 0 |
|  | Epinephelus tauvina | Commercial | Missing in Marine reserve | 3 | 0.1 | | 0 | 0 |
|  | Cephalopholis argus | Commercial | Shared common | 2 | 0.1 | | 29 | 0.1 |
|  | Epinephelus merra | Commercial | Shared common | 2 | 0.1 | | 1 | 0 |
|  | Cephalopholis spiloparaea | Commercial | Missing in Marine reserve | 2 | 0.1 | | 0 | 0 |
|  | Aethaloperca rogaa | Commercial | Shared common | 1 | 0 | | 11 | 0.1 |
|  | Epinephelus spilotoceps | Commercial | Shared common | 1 | 0 | | 1 | 0 |
|  | Epinephelus areolatus | Commercial | Missing in Marine reserve | 1 | 0 | | 0 | 0 |
|  | Nemanthias carberryi | Non-commercial | Missing in Catch | 0 | 0 | | 75 | 0.4 |
|  | Anyparodon leucogrammicus | Commercial | Missing in Catch | 0 | 0 | | 3 | 0 |
|  | Epinephelus fuscoguttatus | Commercial | Missing in Catch | 0 | 0 | | 2 | 0 |
|  | Variola louti | Commercial | Missing in Catch | 0 | 0 | | 2 | 0 |
|  | Cephalopholis nigripinnis | Commercial | Missing in Catch | 0 | 0 | | 1 | 0 |
| Siganidae | Siganus sutor | Commercial | Shared common | 360 | 15.8 | | 45 | 0.2 |
|  | Siganus canaliculatus | Commercial | Missing in Marine reserve | 11 | 0.5 | | 0 | 0 |
|  | Siganus stellatus | Commercial | Missing in Marine reserve | 4 | 0.2 | | 0 | 0 |
|  | Siganus argenteus | Commercial | Missing in Marine reserve | 2 | 0.1 | | 0 | 0 |
| Sillaginidae | Sillago sihama | Commercial | Missing in Marine reserve | 2 | 0.1 | | 0 | 0 |
| Sphyraenidae | Sphyraena obtusata | Commercial | Missing in Marine reserve | 54 | 2.4 | | 0 | 0 |
|  | Sphyraena barracuda | Commercial | Missing in Marine reserve | 17 | 0.7 | | 0 | 0 |
|  | Sphyraena flavicauda | Commercial | Missing in Marine reserve | 12 | 0.5 | | 0 | 0 |
|  | Sphyraena jello | Commercial | Missing in Marine reserve | 7 | 0.3 | | 0 | 0 |
| Synodontidae | Saurida gracilis | Non-commercial | Missing in Marine reserve | 1 | 0 | | 0 | 0 |
| Terapontidae | Terapon jarbua | Commercial | Missing in Marine reserve | 3 | 0.1 | | 0 | 0 |

Supplementary Table 4a. Logistic nonlinear least-squares regressions parameter estimates (mean ± SE) of significant fish family biomass categories. See figure 2 for time series plots. NS denotes no statistical significance for P>0.1. Families ordered from high to low K value.

| Fish families | Parameter | Estimate | Lower 95% CI | Upper 95% CI | t value | Pr(>/t/) |
| --- | --- | --- | --- | --- | --- | --- |
| Acanthuridae | K | 233.2 ± 70.2 | 87.3 | 379.2 | 3.3 | 0.003 |
|  | B0 |  |  |  |  | NS |
|  | r |  |  |  |  | NS |
| Labridae | K |  |  |  |  | NS |
|  | B0 | 64.2 ± 30.4 | 33.5 | 102.8 | 2.1 | 0.0469 |
|  | r |  |  |  |  | NS |
| Lutjanidae | K | 134.0 ± 66.9 | 5.5 | 273.4 | 2.0 | 0.05 |
|  | B0 |  |  |  |  | NS |
|  | r |  |  |  |  | NS |
| Serranidae | K | 123.4 ± 29.4 | 61.4 | 185.3 | 4.2 | 0.0006 |
|  | B0 |  |  |  |  | NS |
|  | r |  |  |  |  | NS |
| Others | K |  |  |  |  | NS |
|  | B0 | 55.2 ± 26.5 | 14.3 | 110.4 | 2.1 | 0.0495 |
|  | r |  |  |  |  | NS |
| Lethrinidae | K | 21.0 ± 7.6 | 5.0 | 37.1 | 2.8 | 0.01 |
|  | B0 |  |  |  |  | NS |
|  | r |  |  |  |  | NS |
| Balistidae | K | 29.1 ± 2.7 | 23.5 | 34.6 | 10.9 | <0.0001 |
|  | B0 |  |  |  |  | NS |
|  | r |  |  |  |  | NS |
| Chaetodontidae | K | 28.2 ± 3.3 | 21.2 | 35.1 | 8.5 | <0.0001 |
|  | B0 |  |  |  |  | NS |
|  | r |  |  |  |  | NS |
| Pomacanthidae | K |  |  |  |  | NS |
|  | B0 | 15.0 ± 6.5 | 1.5 | 28.4 | 2.3 | 0.03 |
|  | r |  |  |  |  | NS |
| Pempheridae | K | 15.7 ± 8.1 | 1.4 | 32.8 | 1.9 | 0.06 |
|  | B0 |  |  |  |  | NS |
|  | r |  |  |  |  | NS |
| Siganidae | K | 12.2 ± 2.7 | 6.6 | 17.8 | 4.6 | 0.0002 |
|  | B0 |  |  |  |  | NS |
|  | r |  |  |  |  | NS |
| Carangidae | K | 12.2 ± 5.8 | 0.1 | 24.5 | 2.1 | 0.05 |
|  | B0 |  |  |  |  | NS |
|  | r |  |  |  |  | NS |
| Penguipedidae | K | 0.5 ± 0.1 | 0.2 | 0.8 | 3.5 | 0.003 |
|  | B0 |  |  |  |  | NS |
|  | r |  |  |  |  | NS |
| Total biomass | K | 1532.0 ± 302.7 | 915.5 | 2148.8 | 5.1 | <0.0001 |
|  | B0 | 298.7 ± 74.4 | 147.2 | 450.3 | 4.0 | 0.0003 |
|  | r | 0.10 ± 0.03 | 0.02 | 0.15 | 2.8 | 0.008 |

Supplementary Table 4b. Linear regressions parameter estimates (mean ± SE) of significant fish family biomass categories. See figure 2 for time series plots and figure 4 for production estimates. NS denotes no statistical significance.

| Family | Coefficients | Estimates | t value | Pr(>|t|) | R-squared |
| --- | --- | --- | --- | --- | --- |
| Acanthuridae | Intercept | 72.2 ± 32.6 | 2.2 | 0.038 | 0.30 |
|  | Closure age | 3.8 ± 1.2 | 3.2 | 0.004 |  |
| Scarinae | Intercept | 91.9 ± 49.1 | 1.9 | 0.07 | 0.20 |
|  | Closure age | 4.2 ± 1.8 | 2.3 | 0.03 |  |
| Labrinae | Intercept | 69.5 ± 23.7 | 2.9 | 0.008 | 0.08 |
|  | Closure age | 1.2 ± 0.9 | 1.4 | NS |  |
| Lutjanidae | Intercept | 22.0 ± 36.1 | 0.6 | NS | 0.20 |
|  | Closure age | 2.7 ± 1.4 | 2 | 0.058 |  |
| Serranidae | Intercept | 11.3 ± 32.6 | 0.3 | NS | 0.30 |
|  | Closure age | 2.9 ± 1.1 | 2.6 | 0.02 |  |
| Others | Intercept | 55.2 ± 24.8 | 2.2 | 0.037 | 0.00001 |
|  | Closure age | 0.01 ± 0.9 | 0.01 | NS |  |
| Haemulidae | Intercept | 25.3 ± 16.9 | 1.5 | NS | 0.10 |
|  | Closure age | 1.0 ± 0.6 | 1.8 | 0.09 |  |
| Balistidae | Intercept | 4.2 ± 3.8 | 1.1 | NS | 0.50 |
|  | Closure age | 0.7 ± 0.1 | 4.8 | <0.0001 |  |
| Chaetodontidae | Intercept | 26.8 ± 6.3 | 4.2 | 0.0003 | 0.002 |
|  | Closure age | -0.05 ± 0.2 | -0.2 | NS |  |
| Pomacanthidae | Intercept | 15.5 ± 5.2 | 2.9 | 0.007 | 0.007 |
|  | Closure age | -0.07 ± 0.2 | -0.4 | NS |  |
| Mullidae | Intercept | -8.2 ± 22.3 | -0.4 | NS | 0.13 |
|  | Closure age | 1.5 ± 0.8 | 1.8 | 0.08 |  |
| Holocentridae | Intercept | 0.2 ± 24.4 | 0.01 | NS | 0.19 |
|  | Closure age | 1.7 ± 0.8 | 2.0 | 0.055 |  |
| Total biomass | Intercept | 301.2 ± 72.2 | 4.2 | 0.0002 | 0.70 |
|  | Closure age | 27.6 ± 3.3 | 8.3 | <0.0001 |  |

Supplementary Table 5. Principal component analysis (PCA) list of species for both gear and site. Respective fish families are presented.

| PCA number | Family | Species | PCA number | Family | Species |
| --- | --- | --- | --- | --- | --- |
| 1 | Acanthuridae | Acanthurus dussumieri | 34 | Lethrinidae | Lethrinus mahsena |
| 2 | Acanthuridae | Acanthurus leucosternon | 35 | Lethrinidae | Lethrinus microdon |
| 3 | Acanthuridae | Acanthurus nigricauda | 36 | Lethrinidae | Lethrinus nebulosus |
| 4 | Acanthuridae | Acanthurus tennenti | 37 | Lethrinidae | Lethrinus obsoletus |
| 5 | Acanthuridae | Ctenochaetus striatus | 38 | Lethrinidae | Lethrinus olivaceus |
| 6 | Acanthuridae | Naso annulatus | 39 | Lethrinidae | Lethrinus rubrioperculatus |
| 7 | Acanthuridae | Naso brachycentron | 40 | Lethrinidae | Lethrinus variegatus |
| 8 | Acanthuridae | Naso fageni | 41 | Lethrinidae | Monotaxis grandoculis |
| 9 | Acanthuridae | Naso hexacanthus | 42 | Lutjanidae | Aphareus furca |
| 10 | Chaetodontidae | Chaetodon auriga | 43 | Lutjanidae | Aprion virescens |
| 11 | Haemulidae | Plectorhinchus centurio | 44 | Lutjanidae | Lutjanus argentimaculatus |
| 12 | Haemulidae | Plectorhinchus chubbi | 45 | Lutjanidae | Lutjanus erythropterus |
| 13 | Haemulidae | Plectorhinchus flavomaculatus | 46 | Lutjanidae | Lutjanus fulviflamma |
| 14 | Haemulidae | Plectorhinchus gaterinus | 47 | Lutjanidae | Lutjanus gibbus |
| 15 | Haemulidae | Plectorhinchus schotaf | 48 | Lutjanidae | Lutjanus kasmira |
| 16 | Haemulidae | Plectorhinchus sordidus | 49 | Lutjanidae | Lutjanus lutjanus |
| 17 | Haemulidae | Plectorhinchus vittatus | 50 | Mullidae | Mulloidichthys vanicolensis |
| 18 | Holocentridae | Myripristis berndti | 51 | Mullidae | Parupeneus barberinus |
| 19 | Holocentridae | Myripristis murdjan | 52 | Mullidae | Parupeneus cyclostomus |
| 20 | Holocentridae | Sargocentron caudimaculatum | 53 | Mullidae | Parupeneus heptacanthus |
| 21 | Holocentridae | Sargocentron diadema | 54 | Mullidae | Parupeneus indicus |
| 22 | Holocentridae | Sargocentron praslin | 55 | Mullidae | Parupeneus macronemus |
| 23 | Holocentridae | Sargocentron spiniferum | 56 | Mullidae | Parupeneus rubescens |
| 24 | Labridae | Anampses caeruleopunctatus | 57 | Mullidae | Upeneus margarethae |
| 25 | Labridae | Bodianus bilunulatus | 58 | Mullidae | Upeneus moluccensis |
| 26 | Labridae | Cheilinus trilobatus | 59 | Mullidae | Upeneus saiab |
| 27 | Labridae | Cheilio inermis | 60 | Mullidae | Upeneus sulphureus |
| 28 | Labridae | Gomphosus caeruleus | 61 | Mullidae | Upeneus vittatus |
| 29 | Labridae | Halichoeres hortulanus | 62 | Pomacanthidae | Pomacanthus imperator |
| 30 | Labridae | Thalassoma lunare | 63 | Scaridae | Calotomus carolinus |
| 31 | Lethrinidae | Lethrinus borbonicus | 64 | Scaridae | Chlorurus gibbus |
| 32 | Lethrinidae | Lethrinus harak | 65 | Scaridae | Leptoscarus vaigiensis |
| 33 | Lethrinidae | Lethrinus lentjan | 66 | Scaridae | Scarus falcipinnis |
| 67 | Scaridae | Scarus frenatus | 103 | Chaetodontidae | Chaetodon zanzibarensis |
| 68 | Scaridae | Scarus ghobban | 104 | Chaetodontidae | Forcipiger flavissimus |
| 69 | Scaridae | Scarus globiceps | 105 | Haemulidae | Plectorhinchus plagiodesmus |
| 70 | Scaridae | Scarus psittacus | 106 | Haemulidae | Plectorhinchus centurio |
| 71 | Scaridae | Scarus rubroviolaceus | 107 | Haemulidae | Plectorhinchus chubbi |
| 72 | Serranidae | Aethaloperca rogaa | 108 | Haemulidae | Plectorhinchus flavomaculatus |
| 73 | Serranidae | Cephalopholis argus | 109 | Haemulidae | Plectorhinchus gaterinus |
| 74 | Serranidae | Cephalopholis spiloparaea | 110 | Haemulidae | Plectorhinchus plagiodesmus |
| 75 | Serranidae | Epinephelus areolatus | 111 | Haemulidae | Plectorhinchus schotaf |
| 76 | Serranidae | Epinephelus merra | 112 | Haemulidae | Plectorhinchus sordidus |
| 77 | Serranidae | Epinephelus rivulatus | 113 | Haemulidae | Plectorhinchus vittatus |
| 78 | Serranidae | Epinephelus spilotoceps | 114 | Holocentridae | Neoniphon sammara |
| 79 | Serranidae | Epinephelus tauvina | 115 | Holocentridae | Myripristis adusta |
| 80 | Siganidae | Siganus argenteus | 116 | Holocentridae | Myripristis seychellensis |
| 81 | Siganidae | Siganus canaliculatus | 117 | Labridae | Cheilinus fasciatus |
| 82 | Siganidae | Siganus stellatus | 118 | Labridae | Cheilinus oxycephalus |
| 83 | Siganidae | Siganus sutor | 119 | Labridae | Cheilinus undulatus |
| 84 | Acanthuridae | Acanthurus nigrofuscus | 120 | Labridae | Coris aygula |
| 85 | Acanthuridae | Ctenochaetus binotatus | 121 | Labridae | Coris formosa |
| 86 | Acanthuridae | Ctenochaetus strigosus | 122 | Labridae | Epibulus insidiator |
| 87 | Acanthuridae | Naso elegans | 123 | Labridae | Halichoeres cosmetus |
| 88 | Acanthuridae | Naso tuberosus | 124 | Labridae | Halichoeres scapularis |
| 89 | Acanthuridae | Naso unicornis | 125 | Labridae | Hemigymnus fasciatus |
| 90 | Acanthuridae | Paracanthurus hepatus | 126 | Labridae | Hemigymnus melapterus |
| 91 | Acanthuridae | Zebrasoma scopas | 127 | Labridae | Labrichthys unilineatus |
| 92 | Acanthuridae | Zebrasoma veliferum | 128 | Labridae | Labroides bicolor |
| 93 | Chaetodontidae | Chaetodon bennetti | 129 | Labridae | Labroides dimidiatus |
| 94 | Chaetodontidae | Chaetodon falcula | 130 | Labridae | Novaculichthys taeniourus |
| 95 | Chaetodontidae | Chaetodon guttatissimus | 131 | Labridae | Oxycheilinus digramma |
| 96 | Chaetodontidae | Chaetodon lineolatus | 132 | Labridae | Pseudocheilinus hexataenia |
| 97 | Chaetodontidae | Chaetodon lunula | 133 | Labridae | Stethojulis albovittata |
| 98 | Chaetodontidae | Chaetodon melannotus | 134 | Labridae | Thalassoma amblycephalum |
| 99 | Chaetodontidae | Chaetodon meyeri | 135 | Labridae | Thalassoma hardwicke |
| 100 | Chaetodontidae | Chaetodon trifascialis | 136 | Labridae | Thalassoma hebraicum |
| 101 | Chaetodontidae | Chaetodon trifasciatus | 137 | Labridae | Anampses meleagrides |
| 102 | Chaetodontidae | Chaetodon xanthocephalus | 138 | Labridae | Anampses twistii |
| 139 | Labridae | Bodianus axillaris | 150 | Scaridae | Scarus sordidus |
| 140 | Lethrinidae | Gnathodentex aureolineatus | 151 | Scaridae | Scarus tricolor |
| 141 | Lethrinidae | Lethrinus erythropterus | 152 | Scaridae | Scarus viridifucatus |
| 142 | Lutjanidae | Lutjanus monostigma | 153 | Scaridae | Hipposcarus harid |
| 143 | Lutjanidae | Lutjanus bohar | 154 | Scaridae | Cetoscarus bicolor |
| 144 | Mullidae | Mulloidichthys flavolineatus | 155 | Serranidae | Nemanthias carberryi |
| 145 | Pomacanthidae | Pomacanthus semicirculatus | 156 | Serranidae | Variola louti |
| 146 | Pomacanthidae | Pygoplites diacanthus | 157 | Serranidae | Cephalopholis boenak |
| 147 | Pomacanthidae | Centropyge multispinis | 158 | Serranidae | Cephalopholis nigripinnis |
| 148 | Scaridae | Scarus atrilunula | 159 | Serranidae | Epinephelus fuscoguttatus |
| 149 | Scaridae | Scarus niger | 160 | Serranidae | Anyparodon leucogrammicus |

Supplementary Table 6. Length-based analysis results organized by family. Represented are number of samples (n), maximum length (Lmax) within the sample, maximum length (Lmax) according to FishBase (Froese and Pauly 2023). Results from length of optimum yield (Lopt), mean of the ratio of L:Lopt along with standard error and upper and lower 95% confidence intervals. The same outputs are presented for length at maturity (Lmat). Finally, the spawning potential ratio (SPR) values are presented along with the source (FishBase or FishLife; see main text for details).

| Family | Species | n | Lmax_local | Lmax_FishBase | Lopt_cm | Lopt_ratio_mean | Lopt_ratio_se | Lopt_ratio_95UL | Lopt_ratio_95LL | Lmat_cm | Lmat_ratio_mean | Lmat_ratio_se | Lmat_ratio_95UL | Lmat_ratio_95LL | Source | SPR |
| --- | --- | --- | --- | --- | --- | --- | --- | --- | --- | --- | --- | --- | --- | --- | --- | --- |
| Lutjanidae | Aphareus furca | 81 | 24 | 70 | 46 | 0.341 | 0.004 | 0.349 | 0.332 | 39 | 0.402 | 0.005 | 0.411 | 0.392 | FishBase | 0 |
| Carangidae | Atule mate | 43 | 32 | 30 | 21 | 1.057 | 0.031 | 1.118 | 0.996 | 20 | 1.116 | 0.033 | 1.181 | 1.052 | FishBase | 48 |
| Carangidae | Carangoides malabaricus | 32 | 26 | 60 | 24 | 0.898 | 0.022 | 0.941 | 0.856 | 22 | 0.968 | 0.023 | 1.013 | 0.922 | FishBase | 8 |
| Gerreidae | Gerres longirostris | 31 | 24 | 45 | 19 | 0.966 | 0.026 | 1.017 | 0.914 | 19 | 1.013 | 0.028 | 1.067 | 0.959 | FishBase | 47 |
| Gerreidae | Gerres oyena | 161 | 28 | 30 | 19 | 0.975 | 0.011 | 0.997 | 0.954 | 19 | 1.023 | 0.012 | 1.045 | 1.000 | FishBase | 16 |
| Scaridae | Leptoscarus vaigiensis | 73 | 33 | 35 | 23 | 0.972 | 0.019 | 1.009 | 0.936 | 21 | 1.041 | 0.020 | 1.080 | 1.002 | FishBase | 11 |
| Lethrinidae | Lethrinus borbonicus | 35 | 38 | 40 | 17 | 1.214 | 0.048 | 1.308 | 1.121 | 17 | 1.259 | 0.049 | 1.355 | 1.162 | FishBase | 77 |
| Lethrinidae | Lethrinus harak | 38 | 30 | 58 | 26 | 0.868 | 0.025 | 0.917 | 0.818 | 24 | 0.949 | 0.028 | 1.003 | 0.894 | FishBase | 21 |
| Lethrinidae | Lethrinus lentjan | 232 | 35 | 52 | 29 | 0.659 | 0.007 | 0.673 | 0.646 | 24 | 0.785 | 0.008 | 0.802 | 0.769 | FishLife | 0 |
| Lutjanidae | Lutjanus fulviflamma | 116 | 27 | 35 | 27 | 0.689 | 0.010 | 0.709 | 0.669 | 20 | 0.914 | 0.014 | 0.941 | 0.887 | FishLife | 1 |
| Lutjanidae | Lutjanus lutjanus | 35 | 20 | 35 | 17 | 0.943 | 0.018 | 0.979 | 0.908 | 16 | 0.972 | 0.019 | 1.009 | 0.936 | FishBase | 20 |
| Mullidae | Parupeneus heptacanthus | 36 | 26 | 36 | 20 | 0.995 | 0.027 | 1.048 | 0.942 | 17 | 1.185 | 0.032 | 1.248 | 1.122 | FishLife | 20 |
| Mullidae | Parupeneus macronemus | 37 | 33 | 40 | 26 | 0.793 | 0.026 | 0.845 | 0.742 | 24 | 0.867 | 0.029 | 0.923 | 0.811 | FishBase | 13 |
| Scaridae | Scarus ghobban | 61 | 55 | 75 | 50 | 0.628 | 0.025 | 0.677 | 0.580 | 42 | 0.749 | 0.030 | 0.807 | 0.691 | FishBase | 12 |
| Nemipteridae | Scolopsis bimaculata | 45 | 29 | 31 | 20 | 0.975 | 0.021 | 1.016 | 0.935 | 19 | 1.027 | 0.022 | 1.069 | 0.984 | FishBase | 26 |
| Siganidae | Siganus sutor | 360 | 38 | 53 | 29 | 0.909 | 0.010 | 0.928 | 0.890 | 26 | 1.017 | 0.011 | 1.038 | 0.996 | FishBase | 19 |
| Sphyraenidae | Sphyraena obtusata | 54 | 25 | 55 | 21 | 0.981 | 0.009 | 1.000 | 0.963 | 20 | 1.046 | 0.010 | 1.065 | 1.026 | FishBase | 12 |
